# Supplementary material for: Nonrobust Strong Knapsack Cuts for Capacitated Location Routing and Related Problems
Source: Atypon-hosted journal article supplement (doi:10.1287/opre.2023.2458), 2023-06-06
Supplement: opre.2023.2458.sm1.pdf [file opre.2023.2458.sm1.pdf]

## Detailed Computational Results

### EC.1. Proof of Theorem 3

*Proof of Theorem 3.* If  $\xi t \leq 1$  defines facet of  $\mathcal{P}_{\text{MKP}}(W_i)$  there are  $W_i$  affinely independent points  $p^j$ ,  $j = 1, \dots, |W_i|$ , satisfying  $\xi p^j = 1$ . Then  $(p^j, 1)$ ,  $j = 1, \dots, |W_i|$ , and  $(\mathbf{0}, 0)$  are  $W_i + 1$  affinely independent points satisfying  $\xi\theta = y_i$ .

If  $\xi\theta \leq y_i$  defines a facet of  $\text{conv}\{(\theta^i, y_i) \in \mathbb{Z}_+^{W_i} \times \{0, 1\} : \sum_{q=1}^{W_i} q\theta_q \leq W_i y_i\}$  there are  $W_i + 1$  affinely independent integer points satisfying  $\xi\theta = y_i$ . One of those points is certainly  $(\mathbf{0}, 0)$ , the remaining points have the format  $(p^j, 1)$ ,  $j = 1, \dots, |W_i|$ . Then,  $p^j$ ,  $j = 1, \dots, |W_i|$ , are  $W_i$  affinely independent points satisfying  $\xi\theta = 1$ .  $\square$

### EC.2. Detailed results for LRP

In the following tables, BKS stands for the best-known solution, IPB for the initial primal bound, RDB for the root dual bound, Rg for the root gap, Rt for the time spent in the root node, Nodes for the number of nodes explored in the branch-and-bound tree, Fg for the final gap, BPB for the best primal bound, and  $t$  for the total time. New best solutions are in bold.

In Table EC.1, the IPB values that were already proven to be optimal are labeled with \*. Nine instances were solved to optimality for the first time. In two cases the optimal solutions improve upon the previous best-known solutions. Table EC.2 are similar experiments, but without using IPBs. The results show that one less instance is solved. For the 24 instances solved in both ways, the geometric mean of the running times increases from 238 seconds to 628 seconds, a factor of 2.6. It is clear that external bounds do help the BCP algorithm, but they are not essential for overall performance. Table EC.3 and Table EC.4 are comparisons with Contardo et al. (2014), using the same IPBs. Finally, Table EC.5 are results on the new Schneider and Löffler (2019) instances, using the best-known solutions in the literature as IPBs.

Table EC.1: Detailed results for algorithm  $\text{BCP}_{\text{all}}$  initialized with the best known primal bounds in the literature on instances PPW06

| Instance        | IPB     | Rg (%) | Rt (s) | Nodes | Fg (%) | BPB           | $t$ (s) |
|-----------------|---------|--------|--------|-------|--------|---------------|---------|
| coord50-5-1     | 90111*  | 0.00%  | 8      | 1     | 0.00%  | 90111         | 7       |
| coord50-5-1b    | 63242   | 0.00%  | 84     | 1     | 0.00%  | 63242         | 83      |
| coord50-5-2     | 88298*  | 2.22%  | 10     | 3     | 0.00%  | 88298         | 14      |
| coord50-5-2BIS  | 84055*  | 0.00%  | 5      | 1     | 0.00%  | 84055         | 5       |
| coord50-5-2b    | 67308*  | 2.37%  | 74     | 3     | 0.00%  | 67308         | 174     |
| coord50-5-2bBIS | 51822*  | 0.00%  | 8      | 1     | 0.00%  | 51822         | 7       |
| coord50-5-3     | 86203*  | 0.00%  | 19     | 1     | 0.00%  | 86203         | 18      |
| coord50-5-3b    | 61830*  | 0.00%  | 38     | 1     | 0.00%  | 61830         | 37      |
| coord100-10-1   | 287661  | 1.04%  | 161    | 55    | 0.00%  | 287661        | 2683    |
| coord100-10-1b  | 230989  | 0.43%  | 360    | 13    | 0.00%  | 230989        | 2025    |
| coord100-10-2   | 243590* | 1.07%  | 153    | 9     | 0.00%  | 243590        | 660     |
| coord100-10-2b  | 203988* | 0.35%  | 457    | 3     | 0.00%  | 203988        | 936     |
| coord100-10-3   | 250882  | 2.24%  | 137    | 33    | 0.00%  | 250882        | 1591    |
| coord100-10-3b  | 203114  | 1.56%  | 214    | 31    | 0.00%  | 203114        | 11173   |
| coord100-5-1    | 274814* | 0.00%  | 32     | 1     | 0.00%  | 274814        | 31      |
| coord100-5-1b   | 213568* | 0.16%  | 272    | 3     | 0.00%  | 213568        | 393     |
| coord100-5-2    | 193671* | 0.00%  | 19     | 1     | 0.00%  | 193671        | 18      |
| coord100-5-2b   | 157095* | 0.00%  | 157    | 1     | 0.00%  | 157095        | 156     |
| coord100-5-3    | 200079* | 0.00%  | 64     | 1     | 0.00%  | 200079        | 63      |
| coord100-5-3b   | 152441* | 0.00%  | 90     | 1     | 0.00%  | 152441        | 90      |
| coord200-10-1   | 474850  | 0.25%  | 481    | 21    | 0.00%  | <b>474702</b> | 1949    |
| coord200-10-1b  | 375177  | 0.09%  | 2842   | 5     | 0.00%  | 375177        | 4354    |
| coord200-10-2   | 448077  | 0.27%  | 586    | 213   | 0.00%  | <b>448005</b> | 20961   |
| coord200-10-2b  | 373696  | 0.12%  | 1907   | 9     | 0.00%  | 373696        | 6633    |
| coord200-10-3   | 469433* | 0.07%  | 472    | 3     | 0.00%  | 469433        | 578     |
| coord200-10-3b  | 362320  | 0.39%  | 1755   | 135   | 0.21%  | 362320        | 107998  |

Table EC.2: Detailed results for algorithm  $\text{BCP}_{\text{all}}$  executed on instances PPW06 without initial upper bound

| Instance        | BKS    | RDB    | Rt (s) | Nodes | Fg (%) | BPB    | $t$ (s) |
|-----------------|--------|--------|--------|-------|--------|--------|---------|
| coord50-5-1     | 90111  | 89853  | 15     | 3     | 0.00%  | 90111  | 38      |
| coord50-5-1b    | 63242  | 62604  | 53     | 5     | 0.00%  | 63242  | 284     |
| coord50-5-2     | 88298  | 86315  | 15     | 5     | 0.00%  | 88298  | 82      |
| coord50-5-2BIS  | 84055  | 83875  | 17     | 3     | 0.00%  | 84055  | 74      |
| coord50-5-2b    | 67308  | 65397  | 34     | 5     | 0.00%  | 67308  | 274     |
| coord50-5-2bBIS | 51822  | 51763  | 20     | 3     | 0.00%  | 51822  | 41      |
| coord50-5-3     | 86203  | 85360  | 17     | 3     | 0.00%  | 86203  | 60      |
| coord50-5-3b    | 61830  | 61329  | 38     | 3     | 0.00%  | 61830  | 99      |
| coord100-10-1   | 287661 | 284453 | 93     | 79    | 0.00%  | 287661 | 4258    |
| coord100-10-1b  | 230989 | 229802 | 177    | 15    | 0.00%  | 230989 | 3760    |
| coord100-10-2   | 243590 | 240915 | 97     | 11    | 0.00%  | 243590 | 795     |
| coord100-10-2b  | 203988 | 202990 | 198    | 7     | 0.00%  | 203988 | 1393    |
| coord100-10-3   | 250882 | 245041 | 96     | 129   | 0.00%  | 250882 | 5630    |
| coord100-10-3b  | 203114 | 199867 | 161    | 39    | 0.00%  | 203114 | 11517   |
| coord100-5-1    | 274814 | 273995 | 29     | 3     | 0.00%  | 274814 | 79      |
| coord100-5-1b   | 213568 | 212635 | 72     | 15    | 0.00%  | 213568 | 1620    |
| coord100-5-2    | 193671 | 193506 | 37     | 3     | 0.00%  | 193671 | 63      |
| coord100-5-2b   | 157095 | 156758 | 123    | 5     | 0.00%  | 157095 | 400     |
| coord100-5-3    | 200079 | 199503 | 55     | 7     | 0.00%  | 200079 | 248     |
| coord100-5-3b   | 152441 | 152344 | 191    | 3     | 0.00%  | 152441 | 355     |
| coord200-10-1   | 474702 | 473451 | 290    | 57    | 0.00%  | 474702 | 7732    |
| coord200-10-1b  | 375177 | 373958 | 956    | 31    | 0.00%  | 375177 | 19457   |
| coord200-10-2   | 448077 | 446558 | 330    | 901   | 0.30%  | 448475 | 107995  |
| coord200-10-2b  | 373696 | 372523 | 715    | 51    | 0.00%  | 373696 | 29804   |
| coord200-10-3   | 469433 | 468846 | 389    | 9     | 0.00%  | 469433 | 2274    |

---

coord200-10-3b    362320    360656    996    43    –    –    108148

---

Table EC.3: Detailed comparison between algorithm  $BCP_{all}$  and the approach by Contardo et al. (2014) on instances PPW06

| Instance        | IPB    | $BCP_{best}$ |        |       |        |        |         | Contardo et al. (2014) |         |
|-----------------|--------|--------------|--------|-------|--------|--------|---------|------------------------|---------|
|                 |        | Rg (%)       | Rt (s) | Nodes | Fg (%) | BPB    | $t$ (s) | BPB                    | $t$ (s) |
| coord50-5-1     | 90111  | 0.00%        | 8      | 1     | 0.00%  | 90111  | 7       | 90111*                 | 9       |
| coord50-5-1b    | 63242  | 0.00%        | 83     | 1     | 0.00%  | 63242  | 83      | 63242*                 | 243     |
| coord50-5-2     | 88298  | 2.22%        | 10     | 3     | 0.00%  | 88298  | 14      | 88298*                 | 7       |
| coord50-5-2BIS  | 84055  | 0.00%        | 5      | 1     | 0.00%  | 84055  | 5       | 84055*                 | 15      |
| coord50-5-2b    | 67340  | 2.42%        | 74     | 3     | 0.00%  | 67308  | 179     | 67308*                 | 226     |
| coord50-5-2bBIS | 51822  | 0.00%        | 8      | 1     | 0.00%  | 51822  | 8       | 51822*                 | 4       |
| coord50-5-3     | 86203  | 0.00%        | 19     | 1     | 0.00%  | 86203  | 19      | 86203*                 | 48      |
| coord50-5-3b    | 61830  | 0.00%        | 37     | 1     | 0.00%  | 61830  | 37      | 61830*                 | 3       |
| coord100-10-1   | 289017 | 1.52%        | 140    | 117   | 0.00%  | 287661 | 5259    | 289017                 | 23543   |
| coord100-10-1b  | 234641 | 2.01%        | 259    | 15    | 0.00%  | 230989 | 4092    | 234641                 | 19351   |
| coord100-10-2   | 243590 | 1.07%        | 149    | 7     | 0.00%  | 243590 | 516     | 243590*                | 1144    |
| coord100-10-2b  | 203988 | 0.35%        | 454    | 3     | 0.00%  | 203988 | 931     | 203988*                | 165     |
| coord100-10-3   | 252421 | 2.85%        | 134    | 123   | 0.00%  | 250882 | 5255    | 252421                 | 12656   |
| coord100-10-3b  | 204597 | 2.28%        | 200    | 285   | 0.00%  | 203114 | 71156   | 204597                 | 40740   |
| coord100-5-1    | 274814 | 0.00%        | 31     | 1     | 0.00%  | 274814 | 31      | 274814*                | 227     |
| coord100-5-1b   | 214392 | 0.65%        | 188    | 7     | 0.00%  | 213568 | 814     | 213568                 | 24306   |
| coord100-5-2    | 193671 | 0.00%        | 19     | 1     | 0.00%  | 193671 | 18      | 193671*                | 29      |
| coord100-5-2b   | 157173 | 0.15%        | 163    | 3     | 0.00%  | 157095 | 229     | 157095*                | 6389    |
| coord100-5-3    | 200079 | 0.00%        | 65     | 1     | 0.00%  | 200079 | 64      | 200079*                | 63      |
| coord100-5-3b   | 152441 | 0.00%        | 89     | 1     | 0.00%  | 152441 | 89      | 152441*                | 239     |
| coord200-10-1   | 479425 | 1.22%        | 364    | 101   | 0.00%  | 474702 | 13293   | 479425                 | 25298   |
| coord200-10-1b  | 378773 | 1.17%        | 1529   | 37    | 0.00%  | 375177 | 20533   | 378773                 | 120447  |

| Instance       | IPB    | Rg (%) | Rt (s) | Nodes | Fg (%) | BPB    | $t$ (s) | BPB     | $t$ (s) |
|----------------|--------|--------|--------|-------|--------|--------|---------|---------|---------|
| coord200-10-2  | 450468 | 0.82%  | 423    | 1049  | 0.28%  | 448409 | 107997  | 450468  | 15871   |
| coord200-10-2b | 374435 | 0.35%  | 1369   | 81    | 0.00%  | 373696 | 41884   | 374435  | 46988   |
| coord200-10-3  | 472898 | 0.84%  | 488    | 17    | 0.00%  | 469433 | 3341    | 469433* | 9519    |
| coord200-10-3b | 364178 | 0.95%  | 1162   | 91    | 0.71%  | 364178 | 108107  | 364178  | 22867   |

Table EC.4: Detailed comparison between algorithm  $BCP_{\text{best}}$  and the approach by Contardo et al. (2014) on instances **TB99**

| Instance     | IPB     | $BCP_{\text{best}}$ |        |       |        |         |         | Contardo et al. (2014) |         |
|--------------|---------|---------------------|--------|-------|--------|---------|---------|------------------------|---------|
|              |         | Rg (%)              | Rt (s) | Nodes | Fg (%) | BPB     | $t$ (s) | BPB                    | $t$ (s) |
| coordP111112 | 1467.68 | 0.00%               | 136    | 1     | 0.00%  | 1467.68 | 134     | 1467.68*               | 2269    |
| coordP111212 | 1394.80 | 0.36%               | 315    | 3     | 0.00%  | 1394.80 | 521     | 1394.80*               | 10947   |
| coordP112112 | 1167.16 | 0.00%               | 257    | 1     | 0.00%  | 1167.16 | 256     | 1167.16*               | 158     |
| coordP112212 | 791.66  | 0.00%               | 398    | 1     | 0.00%  | 791.66  | 397     | 791.66*                | 934     |
| coordP113112 | 1245.45 | 1.92%               | 2442   | 19    | 0.00%  | 1238.24 | 28648   | 1238.24                | 87225   |
| coordP113212 | 902.26  | 0.00%               | 130    | 1     | 0.00%  | 902.26  | 129     | 902.26*                | 78      |
| coordP131112 | 1900.70 | 0.57%               | 1500   | 5     | 0.00%  | 1892.17 | 3628    | 1896.98                | 177697  |
| coordP131212 | 1965.12 | 0.77%               | 698    | 19    | 0.00%  | 1960.02 | 9097    | 1965.12                | 128169  |
| coordP132112 | 1443.33 | 0.00%               | 696    | 1     | 0.00%  | 1443.32 | 693     | 1443.32*               | 9451    |

Table EC.5: Detailed results for algorithm  $BCP_{\text{all}}$  initialized with best known primal bounds in the literature on instances **SL19**

| Instance | IPB    | Rg (%) | Rt (s) | Nodes | Fg (%) | BPB    | $t$ (s) |
|----------|--------|--------|--------|-------|--------|--------|---------|
| 100-5-1c | 134516 | 0.00%  | 20     | 1     | 0.00%  | 134516 | 19      |

| Instance  | IPB    | Rg (%) | Rt (s) | Nodes | Fg (%) | BPB           | t (s) |
|-----------|--------|--------|--------|-------|--------|---------------|-------|
| 100-5-1d  | 275749 | 0.32%  | 48     | 5     | 0.00%  | 275749        | 121   |
| 100-5-1e  | 292311 | 0.00%  | 41     | 1     | 0.00%  | <b>292301</b> | 40    |
| 100-5-2c  | 83989  | 0.16%  | 9      | 1     | 0.00%  | <b>83855</b>  | 9     |
| 100-5-2d  | 242266 | 0.88%  | 67     | 3     | 0.00%  | <b>242105</b> | 134   |
| 100-5-2e  | 253888 | 0.30%  | 84     | 9     | 0.00%  | 253888        | 253   |
| 100-5-3c  | 87555  | 0.00%  | 12     | 1     | 0.00%  | 87555         | 11    |
| 100-5-3d  | 226783 | 0.07%  | 56     | 1     | 0.00%  | <b>226634</b> | 55    |
| 100-5-3e  | 252603 | 0.00%  | 50     | 1     | 0.00%  | 252603        | 50    |
| 100-5-4a  | 255853 | 0.00%  | 30     | 1     | 0.00%  | 255853        | 29    |
| 100-5-4b  | 214425 | 0.00%  | 94     | 1     | 0.00%  | 214425        | 94    |
| 100-5-4c  | 98129  | 0.53%  | 59     | 5     | 0.00%  | <b>98104</b>  | 124   |
| 100-5-4d  | 250315 | 0.16%  | 61     | 5     | 0.00%  | <b>250301</b> | 99    |
| 100-5-4e  | 211159 | 0.85%  | 116    | 479   | 0.00%  | <b>211113</b> | 15045 |
| 100-10-1c | 92629  | 0.00%  | 17     | 1     | 0.00%  | 92629         | 16    |
| 100-10-1d | 363930 | 0.50%  | 90     | 31    | 0.00%  | 363930        | 1176  |
| 100-10-1e | 344322 | 0.54%  | 191    | 11    | 0.00%  | 344322        | 536   |
| 100-10-2c | 84717  | 0.00%  | 17     | 1     | 0.00%  | 84717         | 16    |
| 100-10-2d | 343252 | 1.14%  | 88     | 53    | 0.00%  | 343252        | 2404  |
| 100-10-2e | 332900 | 0.20%  | 186    | 3     | 0.00%  | 332900        | 275   |
| 100-10-3c | 85618  | 0.29%  | 41     | 1     | 0.00%  | <b>85369</b>  | 40    |
| 100-10-3d | 329990 | 1.28%  | 78     | 443   | 0.00%  | 329990        | 13177 |
| 100-10-3e | 318156 | 0.88%  | 167    | 29    | 0.00%  | <b>318109</b> | 1508  |
| 100-10-4a | 253892 | 0.69%  | 262    | 9     | 0.00%  | <b>253471</b> | 607   |
| 100-10-4b | 211354 | 0.65%  | 743    | 5     | 0.00%  | 211354        | 2154  |
| 100-10-4c | 86215  | 0.00%  | 31     | 1     | 0.00%  | 86215         | 30    |
| 100-10-4d | 328251 | 1.35%  | 117    | 2267  | 0.00%  | <b>328181</b> | 74215 |
| 100-10-4e | 308866 | 0.55%  | 196    | 455   | 0.00%  | <b>308757</b> | 19460 |
| 200-10-1c | 156087 | 0.34%  | 325    | 5     | 0.00%  | <b>156029</b> | 564   |
| 200-10-1d | 638452 | 0.40%  | 398    | 111   | 0.00%  | <b>638068</b> | 10811 |
| 200-10-1e | 599463 | 0.86%  | 694    | 141   | 0.00%  | <b>599069</b> | 14871 |

| Instance  | IPB    | Rg (%) | Rt (s) | Nodes | Fg (%) | BPB           | $t$ (s) |
|-----------|--------|--------|--------|-------|--------|---------------|---------|
| 200-10-2c | 144337 | 0.51%  | 379    | 83    | 0.00%  | <b>144046</b> | 8427    |
| 200-10-2d | 663814 | 0.46%  | 586    | 823   | 0.23%  | <b>663154</b> | 107995  |
| 200-10-2e | 619037 | 0.25%  | 1381   | 467   | 0.00%  | <b>618858</b> | 53043   |
| 200-10-3c | 184885 | 0.06%  | 458    | 1     | 0.00%  | <b>184783</b> | 452     |
| 200-10-3d | 640357 | 0.06%  | 451    | 3     | 0.00%  | <b>640289</b> | 587     |
| 200-10-3e | 604617 | 0.13%  | 1019   | 95    | 0.00%  | <b>604480</b> | 9448    |
| 200-10-4a | 452870 | 0.99%  | 868    | 835   | 0.00%  | <b>452430</b> | 85744   |
| 200-10-4b | 369951 | 0.78%  | 2284   | 135   | 0.43%  | <b>369871</b> | 107997  |
| 200-10-4c | 144407 | 0.46%  | 400    | 125   | 0.00%  | <b>144013</b> | 10930   |
| 200-10-4d | 618590 | 0.34%  | 499    | 297   | 0.00%  | <b>617932</b> | 37803   |
| 200-10-4e | 562854 | 0.36%  | 1114   | 893   | 0.25%  | 562854        | 107995  |
| 200-15-1a | 461203 | 0.38%  | 748    | 153   | 0.00%  | <b>460430</b> | 18752   |
| 200-15-1b | 367397 | 0.54%  | 1872   | 113   | 0.00%  | <b>366359</b> | 67910   |
| 200-15-1c | 148218 | 0.05%  | 134    | 1     | 0.00%  | <b>148141</b> | 127     |
| 200-15-1d | 813941 | 0.24%  | 424    | 25    | 0.00%  | <b>813576</b> | 2225    |
| 200-15-1e | 708837 | 2.15%  | 686    | 1181  | 0.26%  | <b>708585</b> | 107993  |
| 200-15-2a | 513893 | 1.97%  | 608    | 211   | 0.00%  | <b>513512</b> | 21920   |
| 200-15-2b | 406843 | 0.50%  | 2187   | 137   | 0.18%  | <b>406839</b> | 107992  |
| 200-15-2c | 135051 | 0.30%  | 316    | 3     | 0.00%  | <b>134779</b> | 336     |
| 200-15-2d | 811722 | 0.29%  | 776    | 41    | 0.00%  | <b>811361</b> | 4805    |
| 200-15-2e | 712524 | 0.56%  | 877    | 649   | 0.34%  | 712524        | 107993  |
| 200-15-3a | 455676 | 0.53%  | 1249   | 151   | 0.00%  | <b>455351</b> | 20594   |
| 200-15-3b | 357086 | 0.55%  | 2668   | 65    | 0.00%  | <b>356887</b> | 71800   |
| 200-15-3c | 141129 | 0.56%  | 475    | 11    | 0.00%  | <b>140765</b> | 1216    |
| 200-15-3d | 877638 | 0.31%  | 574    | 111   | 0.00%  | <b>877543</b> | 13590   |
| 200-15-3e | 816377 | 2.73%  | 828    | 809   | 2.23%  | <b>816129</b> | 107994  |
| 200-15-4a | 433268 | 0.44%  | 668    | 513   | 0.00%  | <b>432672</b> | 51175   |
| 200-15-4b | 349269 | 0.91%  | 1896   | 137   | 0.50%  | 349269        | 107994  |
| 200-15-4c | 143772 | 0.81%  | 570    | 27    | 0.00%  | <b>143052</b> | 3196    |
| 200-15-4d | 828144 | 0.22%  | 473    | 179   | 0.00%  | <b>826829</b> | 33505   |

| Instance  | IPB     | Rg (%) | Rt (s) | Nodes | Fg (%) | BPB            | $t$ (s) |
|-----------|---------|--------|--------|-------|--------|----------------|---------|
| 200-15-4e | 700202  | 1.53%  | 1649   | 79    | 0.00%  | <b>700013</b>  | 13447   |
| 300-15-1a | 856267  | 0.66%  | 3135   | 389   | 0.25%  | <b>854503</b>  | 107989  |
| 300-15-1b | 622412  | 0.91%  | 9755   | 5     | 0.62%  | 622412         | 108004  |
| 300-15-1c | 366770  | 0.70%  | 1124   | 35    | 0.00%  | <b>364979</b>  | 6341    |
| 300-15-1d | 1339010 | 0.47%  | 1582   | 409   | 0.33%  | <b>1338255</b> | 107987  |
| 300-15-1e | 1217690 | 1.34%  | 2645   | 275   | 0.63%  | 1217690        | 107989  |
| 300-15-2a | 759999  | 1.02%  | 3283   | 331   | 0.21%  | <b>757931</b>  | 107990  |
| 300-15-2b | 557912  | 0.60%  | 16604  | 13    | 0.44%  | 557912         | 107996  |
| 300-15-2c | 311558  | 0.79%  | 1001   | 437   | 0.00%  | <b>310061</b>  | 69751   |
| 300-15-2d | 1301863 | 0.38%  | 1748   | 469   | 0.15%  | <b>1301210</b> | 107984  |
| 300-15-2e | 1272700 | 0.70%  | 3191   | 371   | 0.62%  | 1272700        | 107983  |
| 300-15-3a | 778023  | 0.36%  | 3311   | 39    | 0.00%  | <b>776531</b>  | 20139   |
| 300-15-3b | 594073  | 0.32%  | 23608  | 3     | 0.30%  | 594073         | 115651  |
| 300-15-3c | 341712  | 0.64%  | 1931   | 23    | 0.00%  | <b>340155</b>  | 5450    |
| 300-15-3d | 1358223 | 0.83%  | 2162   | 261   | 0.66%  | 1358223        | 108036  |
| 300-15-3e | 1286877 | 0.55%  | 4233   | 289   | 0.46%  | 1286877        | 108007  |
| 300-15-4a | 747730  | 0.24%  | 3488   | 109   | 0.00%  | <b>746407</b>  | 22202   |
| 300-15-4b | 559877  | 0.54%  | 6247   | 45    | 0.47%  | 559877         | 107982  |
| 300-15-4c | 304254  | 0.89%  | 1842   | 55    | 0.00%  | <b>302390</b>  | 15149   |
| 300-15-4d | 1288091 | 0.44%  | 2045   | 305   | 0.19%  | <b>1285714</b> | 107990  |
| 300-15-4e | 1173516 | 1.92%  | 2362   | 221   | 0.58%  | 1173516        | 107989  |
| 300-20-1a | 1009840 | 6.86%  | 3018   | 107   | 6.76%  | 1009840        | 108004  |
| 300-20-1b | 739604  | 0.81%  | 12842  | 45    | 0.63%  | 739604         | 108023  |
| 300-20-1c | 364096  | 0.92%  | 1502   | 21    | 0.00%  | <b>361735</b>  | 6084    |
| 300-20-1d | 1575390 | 0.50%  | 2601   | 353   | 0.23%  | <b>1572968</b> | 107978  |
| 300-20-1e | 1391567 | 7.97%  | 1769   | 137   | 1.61%  | <b>1320811</b> | 107990  |
| 300-20-2a | 909306  | 1.14%  | 4364   | 287   | 0.65%  | 909306         | 107979  |
| 300-20-2b | 695524  | 0.86%  | 9876   | 23    | 0.46%  | 695524         | 108011  |
| 300-20-2c | 299425  | 0.58%  | 1735   | 33    | 0.00%  | <b>298522</b>  | 8333    |
| 300-20-2d | 1569139 | 0.54%  | 2623   | 257   | 0.45%  | <b>1569042</b> | 107982  |

| Instance  | IPB     | Rg (%) | Rt (s) | Nodes | Fg (%) | BPB           | $t$ (s) |
|-----------|---------|--------|--------|-------|--------|---------------|---------|
| 300-20-2e | 1386386 | 7.88%  | 2043   | 107   | 7.75%  | 1386386       | 108070  |
| 300-20-3a | 929901  | 0.80%  | 3786   | 149   | 0.00%  | <b>927452</b> | 62525   |
| 300-20-3b | 751307  | 0.75%  | 11312  | 3     | 0.75%  | 751307        | 108014  |
| 300-20-3c | 305771  | 0.88%  | 1846   | 71    | 0.00%  | <b>304269</b> | 23007   |
| 300-20-3d | 1539008 | 0.65%  | 3376   | 215   | 0.54%  | 1539008       | 107977  |
| 300-20-3e | 1289734 | 3.46%  | 3968   | 93    | 3.20%  | 1289734       | 107992  |
| 300-20-4a | 859474  | 2.24%  | 3061   | 135   | 1.45%  | 859474        | 107979  |
| 300-20-4b | 687930  | 1.09%  | 7554   | 25    | 0.91%  | 687930        | 108003  |
| 300-20-4c | 300285  | 1.04%  | 1606   | 391   | 0.59%  | <b>299206</b> | 107981  |
| 300-20-4d | 1540194 | 0.59%  | 2868   | 115   | 0.47%  | 1540194       | 108021  |
| 300-20-4e | 1344056 | 3.17%  | 2578   | 103   | 2.72%  | 1344056       | 107983  |

### EC.3. Detailed results for VRP-CMD

In the following tables, IPB stands for the initial primal bound, Rg for the root gap, Rt for the time spent in the root node, Nodes for the number of nodes explored in the branch-and-bound tree, Fg for the final gap, BPB for the best primal bound, and  $t$  for the total time.

Table EC.6 contains instances for which the initial primal bound is the optimal solution.

Table EC.6: Detailed results for algorithm BCP<sub>all</sub> for 183 instances of the VRP-CMD with known optimal solutions

| Instance  | Rg (%) | Rt (s) | Nodes | OPT      | $t$ (s) |
|-----------|--------|--------|-------|----------|---------|
| MDCVRP-10 | 4.91%  | 21     | 67    | 12173.31 | 556     |
| MDCVRP-34 | 0.40%  | 40     | 237   | 8926.51  | 3434    |
| MDCVRP-60 | 9.87%  | 20     | 105   | 10372.76 | 763     |
| MDCVRP-62 | 4.50%  | 27     | 5     | 9106.99  | 44      |
| MDCVRP-74 | 5.60%  | 13     | 17    | 11038.03 | 291     |

---

| Instance   | Rg (%) | Rt (s) | Nodes | OPT      | t (s) |
|------------|--------|--------|-------|----------|-------|
| MDCVRP-96  | 5.88%  | 15     | 39    | 10986.37 | 1293  |
| MDCVRP-97  | 8.02%  | 17     | 99    | 11581.48 | 1521  |
| MDCVRP-99  | 9.61%  | 17     | 25    | 12139.98 | 413   |
| MDCVRP-103 | 0.17%  | 31     | 21    | 9121.74  | 1276  |
| MDCVRP-126 | 3.32%  | 27     | 61    | 11113.19 | 2545  |
| MDCVRP-130 | 3.17%  | 35     | 9     | 10426.02 | 137   |
| MDCVRP-157 | 5.74%  | 15     | 23    | 11070.27 | 870   |
| MDCVRP-169 | 5.35%  | 23     | 241   | 11562.64 | 3057  |
| MDCVRP-171 | 5.38%  | 19     | 13    | 11534.90 | 176   |
| MDCVRP-174 | 6.13%  | 19     | 231   | 10373.74 | 2786  |
| MDCVRP-236 | 4.86%  | 12     | 13    | 8501.00  | 173   |
| MDCVRP-250 | 0.19%  | 13     | 3     | 9796.07  | 15    |
| MDCVRP-302 | 3.36%  | 25     | 13    | 9771.93  | 604   |
| MDCVRP-326 | 0.12%  | 45     | 5     | 18741.80 | 68    |
| MDCVRP-327 | 5.98%  | 16     | 91    | 21225.95 | 4246  |
| MDCVRP-339 | 8.92%  | 19     | 45    | 22367.17 | 466   |
| MDCVRP-387 | 3.23%  | 37     | 41    | 19946.78 | 606   |
| MDCVRP-390 | 3.39%  | 31     | 19    | 19986.70 | 242   |
| MDCVRP-395 | 3.14%  | 24     | 43    | 21249.03 | 1298  |
| MDCVRP-421 | 5.79%  | 13     | 29    | 21224.26 | 257   |
| MDCVRP-423 | 5.78%  | 14     | 21    | 21245.60 | 401   |
| MDCVRP-425 | 4.60%  | 28     | 49    | 18710.86 | 1371  |
| MDCVRP-439 | 5.86%  | 16     | 29    | 21190.06 | 602   |
| MDCVRP-464 | 5.86%  | 15     | 53    | 21199.69 | 1042  |
| MDCVRP-470 | 0.11%  | 45     | 3     | 18730.92 | 66    |
| MDCVRP-488 | 0.80%  | 21     | 13    | 20116.83 | 917   |
| MDCVRP-502 | 0.52%  | 24     | 27    | 20104.00 | 1116  |
| MDCVRP-587 | 5.87%  | 12     | 29    | 21238.92 | 934   |
| MDCVRP-613 | 3.05%  | 24     | 19    | 21311.24 | 1960  |
| MDCVRP-622 | 7.59%  | 29     | 139   | 11037.13 | 2514  |

---

---

| Instance    | Rg (%) | Rt (s) | Nodes | OPT      | t (s) |
|-------------|--------|--------|-------|----------|-------|
| MDCVRP-632  | 3.59%  | 11     | 9     | 9146.32  | 400   |
| MDCVRP-639  | 8.95%  | 33     | 111   | 10380.29 | 849   |
| MDCVRP-641  | 2.52%  | 38     | 25    | 10480.34 | 2146  |
| MDCVRP-658  | 8.70%  | 14     | 15    | 7171.93  | 386   |
| MDCVRP-685  | 4.98%  | 25     | 69    | 11024.04 | 1086  |
| MDCVRP-707  | 6.46%  | 18     | 19    | 9730.32  | 282   |
| MDCVRP-734  | 3.26%  | 32     | 9     | 9755.94  | 472   |
| MDCVRP-737  | 5.88%  | 13     | 63    | 7224.22  | 1342  |
| MDCVRP-738  | 0.48%  | 24     | 357   | 7225.52  | 6935  |
| MDCVRP-739  | 0.10%  | 68     | 7     | 7213.34  | 126   |
| MDCVRP-750  | 5.30%  | 26     | 53    | 11050.04 | 1062  |
| MDCVRP-756  | 7.79%  | 34     | 199   | 10360.89 | 1766  |
| MDCVRP-803  | 0.11%  | 33     | 5     | 17427.52 | 303   |
| MDCVRP-822  | 0.56%  | 53     | 17    | 6514.35  | 619   |
| MDCVRP-1000 | 0.37%  | 41     | 9     | 9039.34  | 175   |
| MDCVRP-1002 | 8.44%  | 35     | 273   | 10943.38 | 2968  |
| MDCVRP-1025 | 6.69%  | 29     | 113   | 11452.94 | 1338  |
| MDCVRP-1041 | 7.29%  | 21     | 61    | 11565.85 | 826   |
| MDCVRP-1165 | 8.03%  | 36     | 187   | 10846.28 | 4080  |
| MDCVRP-1172 | 0.23%  | 43     | 17    | 8401.45  | 1185  |
| MDCVRP-1238 | 0.36%  | 37     | 453   | 9021.62  | 7184  |
| MDCVRP-1253 | 7.94%  | 38     | 187   | 21046.28 | 3273  |
| MDCVRP-1262 | 0.24%  | 44     | 53    | 17418.74 | 787   |
| MDCVRP-1268 | 3.45%  | 50     | 3     | 17335.24 | 57    |
| MDCVRP-1279 | 0.62%  | 48     | 37    | 18770.68 | 642   |
| MDCVRP-1284 | 8.66%  | 34     | 373   | 21010.83 | 3452  |
| MDCVRP-1286 | 4.14%  | 52     | 3     | 17335.31 | 71    |
| MDCVRP-1293 | 0.17%  | 50     | 19    | 18638.32 | 221   |
| MDCVRP-1299 | 1.88%  | 23     | 75    | 18548.08 | 1352  |
| MDCVRP-1300 | 3.02%  | 32     | 79    | 19840.65 | 4078  |

---

| Instance    | Rg (%) | Rt (s) | Nodes | OPT      | t (s) |
|-------------|--------|--------|-------|----------|-------|
| MDCVRP-1305 | 2.54%  | 18     | 81    | 17356.16 | 1835  |
| MDCVRP-1318 | 3.25%  | 31     | 3     | 18526.70 | 45    |
| MDCVRP-1359 | 3.85%  | 29     | 9     | 21081.58 | 174   |
| MDCVRP-1364 | 5.37%  | 19     | 7     | 20990.38 | 85    |
| MDCVRP-1368 | 3.47%  | 34     | 3     | 17407.77 | 41    |
| MDCVRP-1370 | 3.14%  | 35     | 3     | 18664.96 | 42    |
| MDCVRP-1411 | 2.22%  | 36     | 9     | 19790.23 | 176   |
| MDCVRP-1465 | 7.66%  | 31     | 29    | 20987.81 | 1380  |
| MDCVRP-1489 | 5.09%  | 23     | 25    | 21047.19 | 328   |
| MDCVRP-1582 | 0.56%  | 40     | 29    | 7087.31  | 1007  |
| MDCVRP-1612 | 5.66%  | 14     | 3     | 7034.78  | 40    |
| MDCVRP-1614 | 0.25%  | 70     | 25    | 6451.33  | 536   |
| MDCVRP-1617 | 4.26%  | 21     | 23    | 7085.51  | 343   |
| MDCVRP-1663 | 4.26%  | 11     | 9     | 9661.81  | 425   |
| MDCVRP-1687 | 0.42%  | 39     | 101   | 7833.00  | 2030  |
| MDCVRP-1738 | 3.97%  | 12     | 3     | 14966.96 | 21    |
| MDCVRP-1739 | 2.57%  | 13     | 15    | 16164.03 | 267   |
| MDCVRP-1765 | 0.22%  | 22     | 51    | 18555.84 | 937   |
| MDCVRP-1799 | 2.72%  | 27     | 75    | 13597.45 | 1282  |
| MDCVRP-1832 | 1.88%  | 36     | 79    | 9069.13  | 885   |
| MDCVRP-1850 | 0.17%  | 37     | 67    | 11711.82 | 640   |
| MDCVRP-1908 | 3.28%  | 11     | 7     | 18673.75 | 62    |
| MDCVRP-1910 | 0.16%  | 44     | 77    | 17543.72 | 994   |
| MDCVRP-1933 | 2.22%  | 13     | 3     | 17343.24 | 24    |
| MDCVRP-1963 | 7.95%  | 31     | 27    | 11507.00 | 393   |
| MDCVRP-2014 | 1.03%  | 32     | 21    | 11015.82 | 242   |
| MDCVRP-2035 | 2.90%  | 16     | 185   | 11039.82 | 1333  |
| MDCVRP-2055 | 3.26%  | 37     | 15    | 9580.49  | 776   |
| MDCVRP-2084 | 0.40%  | 43     | 21    | 9135.65  | 338   |
| MDCVRP-2095 | 0.68%  | 51     | 21    | 8987.88  | 261   |

---

| Instance    | Rg (%) | Rt (s) | Nodes | OPT      | t (s) |
|-------------|--------|--------|-------|----------|-------|
| MDCVRP-2136 | 0.98%  | 23     | 81    | 9109.73  | 2897  |
| MDCVRP-2253 | 6.47%  | 10     | 7     | 18608.38 | 82    |
| MDCVRP-2315 | 5.32%  | 13     | 9     | 11000.87 | 122   |
| MDCVRP-2317 | 0.50%  | 65     | 5     | 10443.01 | 145   |
| MDCVRP-2336 | 0.40%  | 68     | 37    | 10434.83 | 790   |
| MDCVRP-2347 | 6.88%  | 18     | 89    | 12266.93 | 1361  |
| MDCVRP-2355 | 0.17%  | 78     | 5     | 11181.37 | 172   |
| MDCVRP-2423 | 7.26%  | 19     | 727   | 12134.41 | 5752  |
| MDCVRP-2436 | 2.90%  | 23     | 161   | 10898.42 | 4983  |
| MDCVRP-2448 | 2.45%  | 20     | 53    | 10947.31 | 1836  |
| MDCVRP-2456 | 3.39%  | 49     | 7     | 8911.51  | 294   |
| MDCVRP-2459 | 4.24%  | 25     | 189   | 10815.62 | 2751  |
| MDCVRP-2460 | 7.54%  | 30     | 111   | 11394.43 | 3076  |
| MDCVRP-2463 | 3.62%  | 34     | 19    | 11443.10 | 188   |
| MDCVRP-2485 | 4.35%  | 21     | 13    | 10914.65 | 691   |
| MDCVRP-2490 | 4.47%  | 30     | 5     | 10900.54 | 86    |
| MDCVRP-2538 | 3.30%  | 33     | 251   | 11528.30 | 4971  |
| MDCVRP-2543 | 0.51%  | 40     | 181   | 7860.02  | 4444  |
| MDCVRP-2556 | 2.22%  | 25     | 81    | 10936.53 | 2353  |
| MDCVRP-2565 | 2.57%  | 25     | 17    | 10978.89 | 189   |
| MDCVRP-2594 | 2.11%  | 20     | 27    | 10560.02 | 764   |
| MDCVRP-2608 | 2.78%  | 27     | 13    | 10894.13 | 364   |
| MDCVRP-2621 | 2.32%  | 22     | 247   | 21173.52 | 8729  |
| MDCVRP-2636 | 5.43%  | 27     | 37    | 19835.73 | 430   |
| MDCVRP-2641 | 1.87%  | 28     | 3     | 21073.55 | 35    |
| MDCVRP-2651 | 3.52%  | 30     | 9     | 17369.17 | 153   |
| MDCVRP-2687 | 0.20%  | 31     | 281   | 21133.94 | 6823  |
| MDCVRP-2726 | 0.31%  | 61     | 7     | 13837.23 | 195   |
| MDCVRP-2767 | 5.96%  | 31     | 17    | 10222.75 | 334   |
| MDCVRP-2769 | 0.16%  | 71     | 5     | 6488.16  | 204   |

---

| Instance    | Rg (%) | Rt (s) | Nodes | OPT      | t (s) |
|-------------|--------|--------|-------|----------|-------|
| MDCVRP-2771 | 3.21%  | 16     | 23    | 12821.29 | 425   |
| MDCVRP-2784 | 1.32%  | 35     | 41    | 10446.79 | 892   |
| MDCVRP-2805 | 6.10%  | 11     | 17    | 9661.41  | 255   |
| MDCVRP-2814 | 1.40%  | 31     | 87    | 10506.75 | 3394  |
| MDCVRP-2880 | 6.93%  | 29     | 37    | 12210.07 | 537   |
| MDCVRP-2898 | 2.79%  | 33     | 9     | 10977.58 | 200   |
| MDCVRP-2946 | 0.08%  | 87     | 5     | 14977.40 | 178   |
| MDCVRP-2957 | 7.97%  | 27     | 13    | 22349.56 | 470   |
| MDCVRP-2970 | 3.45%  | 40     | 3     | 17419.64 | 68    |
| MDCVRP-2984 | 0.09%  | 27     | 3     | 17459.90 | 338   |
| MDCVRP-3006 | 0.09%  | 21     | 11    | 15067.69 | 211   |
| MDCVRP-3025 | 4.50%  | 11     | 39    | 18645.81 | 964   |
| MDCVRP-3035 | 0.19%  | 32     | 63    | 20058.83 | 737   |
| MDCVRP-3040 | 4.12%  | 12     | 9     | 14953.18 | 187   |
| MDCVRP-3076 | 4.38%  | 22     | 5     | 10950.35 | 49    |
| MDCVRP-3080 | 4.97%  | 39     | 45    | 10319.53 | 379   |
| MDCVRP-3089 | 5.81%  | 18     | 19    | 7113.93  | 379   |
| MDCVRP-3093 | 1.92%  | 38     | 33    | 12450.04 | 637   |
| MDCVRP-3109 | 2.68%  | 12     | 239   | 9717.28  | 2477  |
| MDCVRP-3128 | 8.03%  | 12     | 25    | 7711.85  | 272   |
| MDCVRP-3141 | 7.84%  | 18     | 9     | 7782.68  | 188   |
| MDCVRP-3147 | 8.21%  | 15     | 11    | 7175.18  | 159   |
| MDCVRP-3151 | 5.60%  | 16     | 21    | 7171.69  | 365   |
| MDCVRP-3160 | 0.18%  | 72     | 5     | 6538.21  | 193   |
| MDCVRP-3162 | 0.55%  | 38     | 265   | 7167.42  | 6171  |
| MDCVRP-3174 | 4.68%  | 17     | 59    | 7166.31  | 1448  |
| MDCVRP-3185 | 0.78%  | 60     | 199   | 9799.32  | 2507  |
| MDCVRP-3196 | 8.14%  | 17     | 177   | 7698.86  | 3700  |
| MDCVRP-3237 | 6.16%  | 42     | 37    | 10195.02 | 885   |
| MDCVRP-3240 | 3.29%  | 36     | 121   | 11507.56 | 2298  |

---

| Instance    | Rg (%) | Rt (s) | Nodes | OPT      | t (s) |
|-------------|--------|--------|-------|----------|-------|
| MDCVRP-3274 | 4.50%  | 27     | 25    | 11536.16 | 1548  |
| MDCVRP-3275 | 1.94%  | 42     | 19    | 10956.41 | 1189  |
| MDCVRP-3324 | 0.32%  | 20     | 19    | 7832.43  | 709   |
| MDCVRP-3326 | 0.35%  | 49     | 13    | 9722.02  | 171   |
| MDCVRP-3350 | 6.10%  | 28     | 49    | 19920.29 | 482   |
| MDCVRP-3354 | 7.16%  | 24     | 13    | 22365.66 | 281   |
| MDCVRP-3357 | 0.28%  | 34     | 55    | 21226.58 | 761   |
| MDCVRP-3360 | 2.75%  | 33     | 143   | 18772.84 | 8454  |
| MDCVRP-3367 | 7.24%  | 14     | 85    | 16161.18 | 1558  |
| MDCVRP-3385 | 7.30%  | 13     | 7     | 16154.08 | 74    |
| MDCVRP-3397 | 4.37%  | 25     | 23    | 21227.42 | 391   |
| MDCVRP-3403 | 2.90%  | 35     | 27    | 21109.44 | 876   |
| MDCVRP-3413 | 7.57%  | 23     | 29    | 23426.59 | 409   |
| MDCVRP-3422 | 0.14%  | 28     | 19    | 20051.45 | 209   |
| MDCVRP-3430 | 0.14%  | 29     | 73    | 17329.23 | 936   |
| MDCVRP-3431 | 0.26%  | 67     | 149   | 17454.82 | 2463  |
| MDCVRP-3437 | 5.03%  | 12     | 7     | 16118.20 | 87    |
| MDCVRP-3448 | 2.95%  | 28     | 85    | 22292.76 | 1687  |
| MDCVRP-3453 | 3.53%  | 12     | 5     | 17386.94 | 55    |
| MDCVRP-3508 | 0.98%  | 20     | 23    | 10377.62 | 1179  |
| MDCVRP-3518 | 0.00%  | 40     | 1     | 7088.59  | 39    |
| MDCVRP-3526 | 2.95%  | 19     | 5     | 10260.44 | 178   |
| MDCVRP-3534 | 0.23%  | 113    | 7     | 6530.05  | 203   |
| MDCVRP-3537 | 0.26%  | 67     | 3     | 6495.48  | 96    |
| MDCVRP-3544 | 2.89%  | 28     | 3     | 10238.41 | 42    |
| MDCVRP-3608 | 4.35%  | 16     | 7     | 7202.53  | 108   |
| MDCVRP-3643 | 4.47%  | 18     | 9     | 7182.04  | 184   |
| MDCVRP-3660 | 0.22%  | 26     | 3     | 7109.64  | 64    |

---

Table EC.7 contains instances for which the initial primal bound has not been proven optimal before these experiments.

Table EC.7: Detailed results for algorithm  $\text{BCP}_{\text{best}}$  for 16 instances of the VRP-CMD with unknown optimal solutions

| Instance    | IPB      | Rg (%) | Rt (s) | Nodes | Fg (%) | BPB      | $t$ (s) |
|-------------|----------|--------|--------|-------|--------|----------|---------|
| MDCVRP-87   | 10521.07 | 10.48% | 28     | 2563  | 0.87%  | 10410.72 | 108000  |
| MDCVRP-235  | 11144.42 | 4.44%  | 22     | 473   | 0.00%  | 11112.75 | 34508   |
| MDCVRP-453  | 21285.26 | 3.36%  | 23     | 1749  | 0.28%  | 21279.71 | 108000  |
| MDCVRP-487  | 21352.94 | 3.62%  | 24     | 203   | 0.00%  | 21255.48 | 12772   |
| MDCVRP-528  | 18679.39 | 4.46%  | 19     | 629   | 0.00%  | 18679.39 | 14241   |
| MDCVRP-582  | 23660.82 | 8.59%  | 18     | 575   | 0.00%  | 23660.82 | 17636   |
| MDCVRP-599  | 23579.35 | 8.53%  | 25     | 2639  | 0.25%  | 23578.14 | 108000  |
| MDCVRP-612  | 23708.73 | 8.65%  | 20     | 3591  | 0.17%  | 23708.73 | 108000  |
| MDCVRP-653  | 9200.66  | 3.02%  | 60     | 491   | 0.00%  | 9200.59  | 37617   |
| MDCVRP-1280 | 23567.65 | 10.47% | 23     | 5913  | 0.36%  | 23520.74 | 108000  |
| MDCVRP-1541 | 10231.13 | 6.42%  | 47     | 1075  | 0.00%  | 10231.13 | 12851   |
| MDCVRP-2313 | 11069.50 | 2.16%  | 16     | 1267  | 0.00%  | 11069.50 | 13915   |
| MDCVRP-2431 | 11551.42 | 4.10%  | 35     | 837   | 0.00%  | 11470.91 | 49199   |
| MDCVRP-2444 | 10288.95 | 8.57%  | 13     | 2381  | 4.19%  | 10288.95 | 108000  |
| MDCVRP-2734 | 22379.58 | 3.74%  | 20     | 5899  | 0.00%  | 22372.04 | 96868   |
| MDCVRP-2745 | 19920.04 | 5.41%  | 26     | 6587  | 0.39%  | 19920.04 | 108000  |

#### EC.4. Detailed results for VRPTW with Shifts

In the following tables, BKS stands for the best-known solution value in the literature, RDB for the root dual bound,  $Rt$  for the time spent in the root node, Nodes for the number of nodes explored in the branch-and-bound tree, BDB for the best found dual bound, BPB for the best primal bound, and  $t$  for the total time. Improved solution values in comparison with the literature are in bold. If

the best bounds are equal then the instances are solved to optimality. Sometimes the total solution time is smaller than the time limit of 30 hours, but the best dual and primal bounds are not equal. In this case, the algorithm was interrupted due to a very large solution time of the labeling algorithm.

Table EC.8: Detailed results for algorithm  $\text{BCP}_{\text{all}}$  without initial upper bounds on instances of the VRPTW-S with small shift capacities ( $\rho = 1.05$ )

| Instance  | BKS   | RDB   | Rt (s) | Nodes | BDB   | BPB   | $t$ (s) |
|-----------|-------|-------|--------|-------|-------|-------|---------|
| A-25-c101 | 287.2 | 283.2 | 11     | 3     | 287.2 | 287.2 | 16      |
| A-25-c102 | 263.8 | 263.8 | 9      | 1     | 263.8 | 263.8 | 9       |
| A-25-c103 | 251.8 | 251.8 | 6      | 1     | 251.8 | 251.8 | 5       |
| A-25-c104 | 249.2 | 249.2 | 22     | 1     | 249.2 | 249.2 | 22      |
| A-25-c105 | 265.0 | 263.5 | 4      | 3     | 265.0 | 265.0 | 7       |
| A-25-c106 | 287.2 | 282.8 | 12     | 3     | 287.2 | 287.2 | 18      |
| A-25-c107 | 265.0 | 263.2 | 9      | 3     | 265.0 | 265.0 | 14      |
| A-25-c108 | 263.2 | 261.5 | 9      | 3     | 263.2 | 263.2 | 19      |
| A-25-c109 | 256.5 | 256.5 | 11     | 1     | 256.5 | 256.5 | 11      |
| A-25-c201 | 288.9 | 288.9 | 6      | 1     | 288.9 | 288.9 | 6       |
| A-25-c202 | 281.7 | 281.7 | 3      | 1     | 281.7 | 281.7 | 3       |
| A-25-c203 | 279.3 | 279.3 | 3      | 1     | 279.3 | 279.3 | 3       |
| A-25-c204 | 279.3 | 279.3 | 5      | 1     | 279.3 | 279.3 | 5       |
| A-25-c205 | 288.9 | 288.9 | 3      | 1     | 288.9 | 288.9 | 3       |
| A-25-c206 | 286.7 | 286.7 | 2      | 1     | 286.7 | 286.7 | 1       |
| A-25-c207 | 284.0 | 284.0 | 3      | 1     | 284.0 | 284.0 | 3       |
| A-25-c208 | 285.9 | 285.9 | 4      | 1     | 285.9 | 285.9 | 4       |
| A-25-r101 | 710.9 | 710.9 | 0      | 1     | 710.9 | 710.9 | 0       |
| A-25-r102 | 580.7 | 577.1 | 3      | 3     | 580.7 | 580.7 | 5       |
| A-25-r103 | 504.7 | 496.5 | 5      | 3     | 504.7 | 504.7 | 29      |
| A-25-r104 | 483.6 | 475.9 | 4      | 3     | 483.6 | 483.6 | 10      |
| A-25-r105 | 596.8 | 596.8 | 2      | 1     | 596.8 | 596.8 | 2       |

| Instance   | BKS      | RDB   | Rt (s) | Nodes | BDB   | BPB          | $t$ (s) |
|------------|----------|-------|--------|-------|-------|--------------|---------|
| A-25-r106  | 490.4    | 490.4 | 5      | 1     | 490.4 | 490.4        | 5       |
| A-25-r107  | 457.2    | 454.0 | 6      | 3     | 457.2 | 457.2        | 11      |
| A-25-r108  | 437.7    | 437.7 | 7      | 1     | 437.7 | 437.7        | 7       |
| A-25-r109  | 497.3    | 492.7 | 4      | 3     | 497.3 | 497.3        | 6       |
| A-25-r110  | 467.1    | 458.7 | 7      | 3     | 467.1 | 467.1        | 11      |
| A-25-r111  | 471.7    | 467.0 | 6      | 3     | 471.7 | 471.7        | 11      |
| A-25-r112  | 427.9    | 420.8 | 9      | 3     | 427.9 | 427.9        | 19      |
| A-25-r201  | 502.1    | 502.1 | 6      | 1     | 502.1 | 502.1        | 6       |
| A-25-r202  | 437.8    | 435.8 | 7      | 3     | 437.8 | 437.8        | 17      |
| A-25-r203  | 404.0    | 404.0 | 3      | 1     | 404.0 | 404.0        | 3       |
| A-25-r204  | 375.4    | 375.4 | 2      | 1     | 375.4 | 375.4        | 2       |
| A-25-r205  | 421.2    | 417.4 | 9      | 3     | 421.2 | 421.2        | 17      |
| A-25-r206  | 384.2    | 384.2 | 2      | 1     | 384.2 | 384.2        | 2       |
| A-25-r207  | 375.4    | 375.4 | 2      | 1     | 375.4 | 375.4        | 2       |
| A-25-r208  | 367.4    | 367.4 | 4      | 1     | 367.4 | 367.4        | 4       |
| A-25-r209  | 383.7    | 383.7 | 2      | 1     | 383.7 | 383.7        | 2       |
| A-25-r210  | 421.5    | 421.5 | 3      | 1     | 421.5 | 421.5        | 3       |
| A-25-r211  | 364.9    | 364.9 | 2      | 1     | 364.9 | 364.9        | 2       |
| A-25-rc101 | 608.7    | 600.4 | 1      | 1     | 600.4 | <b>600.4</b> | 1       |
| A-25-rc102 | 470.4    | 454.8 | 11     | 3     | 470.4 | 470.4        | 17      |
| A-25-rc103 | 427.8    | 427.8 | 15     | 1     | 427.8 | 427.8        | 15      |
| A-25-rc104 | 410.3    | 397.7 | 32     | 1     | 397.7 | <b>397.7</b> | 32      |
| A-25-rc105 | 535.6    | 534.7 | 4      | 3     | 535.6 | 535.6        | 6       |
| A-25-rc106 | 472.9    | 472.9 | 2      | 1     | 472.9 | 472.9        | 2       |
| A-25-rc107 | 434.8    | 434.8 | 4      | 1     | 434.8 | 434.8        | 4       |
| A-25-rc108 | $\infty$ | 383.7 | 41     | 3     | 397.0 | <b>397.0</b> | 81      |
| A-25-rc201 | 496.4    | 478.5 | 11     | 1     | 478.5 | <b>478.5</b> | 11      |
| A-25-rc202 | 381.0    | 381.0 | 13     | 1     | 381.0 | 381.0        | 13      |
| A-25-rc203 | 367.1    | 361.9 | 18     | 1     | 361.9 | <b>361.9</b> | 18      |
| A-25-rc204 | $\infty$ | 334.7 | 85     | 1     | 334.7 | <b>334.7</b> | 84      |

| Instance   | BKS      | RDB    | Rt (s) | Nodes | BDB    | BPB          | $t$ (s) |
|------------|----------|--------|--------|-------|--------|--------------|---------|
| A-25-rc205 | 376.3    | 376.3  | 9      | 1     | 376.3  | 376.3        | 9       |
| A-25-rc206 | 369.5    | 369.5  | 8      | 1     | 369.5  | 369.5        | 7       |
| A-25-rc207 | 337.2    | 337.2  | 83     | 1     | 337.2  | 337.2        | 83      |
| A-25-rc208 | $\infty$ | 329.5  | 254    | 1     | 329.5  | <b>329.5</b> | 254     |
| A-50-c101  | 499.5    | 487.4  | 12     | 3     | 499.5  | 499.5        | 20      |
| A-50-c102  | 467.5    | 464.0  | 9      | 3     | 467.5  | 467.5        | 19      |
| A-50-c103  | $\infty$ | 457.5  | 12     | 3     | 461.4  | <b>461.4</b> | 39      |
| A-50-c104  | $\infty$ | 419.0  | 113    | 1     | 419.0  | <b>419.0</b> | 112     |
| A-50-c105  | 466.6    | 462.3  | 7      | 3     | 466.6  | 466.6        | 14      |
| A-50-c106  | 499.5    | 476.4  | 9      | 3     | 499.5  | 499.5        | 34      |
| A-50-c107  | 464.8    | 458.9  | 6      | 3     | 464.8  | 464.8        | 15      |
| A-50-c108  | 500.3    | 456.9  | 11     | 3     | 462.4  | <b>462.4</b> | 21      |
| A-50-c109  | $\infty$ | 445.3  | 17     | 5     | 454.7  | <b>454.7</b> | 57      |
| A-50-c201  | 429.8    | 429.8  | 6      | 1     | 429.8  | 429.8        | 6       |
| A-50-c202  | 421.5    | 421.5  | 59     | 1     | 421.5  | 421.5        | 59      |
| A-50-c203  | $\infty$ | 414.1  | 79     | 1     | 414.1  | <b>414.1</b> | 79      |
| A-50-c204  | $\infty$ | 402.5  | 484    | 3     | 403.2  | <b>403.2</b> | 1544    |
| A-50-c205  | 427.8    | 427.8  | 12     | 1     | 427.8  | 427.8        | 12      |
| A-50-c206  | 427.8    | 427.8  | 15     | 1     | 427.8  | 427.8        | 15      |
| A-50-c207  | $\infty$ | 425.7  | 55     | 3     | 426.1  | <b>426.1</b> | 101     |
| A-50-c208  | 424.2    | 422.5  | 35     | 3     | 422.7  | <b>422.7</b> | 65      |
| A-50-r101  | 1217.3   | 1209.8 | 4      | 3     | 1217.3 | 1217.3       | 6       |
| A-50-r102  | 980.6    | 975.8  | 4      | 3     | 980.6  | 980.6        | 10      |
| A-50-r103  | 820.3    | 812.3  | 10     | 3     | 820.3  | 820.3        | 49      |
| A-50-r104  | 664.6    | 662.2  | 16     | 3     | 664.6  | 664.6        | 43      |
| A-50-r105  | 1037.9   | 1036.2 | 5      | 3     | 1037.9 | 1037.9       | 11      |
| A-50-r106  | 875.6    | 870.5  | 6      | 3     | 875.6  | 875.6        | 16      |
| A-50-r107  | 777.0    | 763.1  | 8      | 7     | 773.8  | <b>773.8</b> | 104     |
| A-50-r108  | 644.8    | 638.1  | 55     | 3     | 644.8  | 644.8        | 140     |
| A-50-r109  | 891.3    | 838.8  | 8      | 3     | 852.3  | <b>852.3</b> | 58      |

| Instance   | BKS      | RDB    | Rt (s) | Nodes | BDB    | BPB           | $t$ (s) |
|------------|----------|--------|--------|-------|--------|---------------|---------|
| A-50-r110  | 749.0    | 741.4  | 14     | 3     | 749.0  | 749.0         | 38      |
| A-50-r111  | 752.4    | 749.4  | 14     | 3     | 752.4  | 752.4         | 28      |
| A-50-r112  | 665.1    | 659.2  | 48     | 3     | 665.1  | 665.1         | 123     |
| A-50-r201  | $\infty$ | 834.2  | 10     | 7     | 844.1  | <b>844.1</b>  | 95      |
| A-50-r202  | 732.7    | 729.6  | 37     | 3     | 732.7  | 732.7         | 80      |
| A-50-r203  | 632.3    | 627.6  | 92     | 3     | 632.3  | 632.3         | 258     |
| A-50-r204  | $\infty$ | 528.3  | 356    | 3     | 530.0  | <b>530.0</b>  | 1208    |
| A-50-r205  | 716.4    | 713.4  | 44     | 3     | 716.4  | 716.4         | 86      |
| A-50-r206  | 649.6    | 648.6  | 104    | 3     | 649.6  | 649.6         | 334     |
| A-50-r207  | 587.8    | 587.5  | 337    | 3     | 587.8  | 587.8         | 1059    |
| A-50-r208  | $\infty$ | 502.4  | 53     | 1     | 502.4  | <b>502.4</b>  | 53      |
| A-50-r209  | 619.1    | 616.2  | 94     | 3     | 619.1  | 619.1         | 182     |
| A-50-r210  | 657.0    | 657.0  | 193    | 1     | 657.0  | 657.0         | 193     |
| A-50-r211  | 541.5    | 541.5  | 125    | 1     | 541.5  | 541.5         | 124     |
| A-50-rc101 | 1174.1   | 1131.1 | 7      | 3     | 1136.8 | <b>1136.8</b> | 8       |
| A-50-rc102 | 975.8    | 951.7  | 23     | 3     | 973.6  | <b>973.6</b>  | 39      |
| A-50-rc103 | $\infty$ | 824.8  | 38     | 3     | 836.5  | <b>836.5</b>  | 91      |
| A-50-rc104 | $\infty$ | 669.7  | 110    | 3     | 697.4  | <b>697.4</b>  | 520     |
| A-50-rc105 | $\infty$ | 1043.6 | 40     | 1     | 1043.6 | <b>1043.6</b> | 45      |
| A-50-rc106 | $\infty$ | 939.5  | 50     | 3     | 956.1  | <b>956.1</b>  | 90      |
| A-50-rc107 | $\infty$ | 766.2  | 501    | 1     | 766.2  | <b>766.2</b>  | 501     |
| A-50-rc108 | $\infty$ | 664.1  | 272    | 21    | 724.3  | <b>724.3</b>  | 4640    |
| A-50-rc201 | $\infty$ | 809.6  | 51     | 3     | 828.6  | <b>828.6</b>  | 122     |
| A-50-rc202 | $\infty$ | 711.2  | 242    | 1     | 711.2  | <b>711.2</b>  | 242     |
| A-50-rc203 | $\infty$ | 645.2  | 346    | 3     | 654.4  | <b>654.4</b>  | 883     |
| A-50-rc204 | $\infty$ | 497.7  | 377    | 13    | 533.3  | <b>533.3</b>  | 4390    |
| A-50-rc205 | 717.7    | 717.7  | 53     | 1     | 717.7  | 717.7         | 53      |
| A-50-rc206 | $\infty$ | 662.9  | 135    | 3     | 669.1  | <b>669.1</b>  | 205     |
| A-50-rc207 | $\infty$ | 588.1  | 306    | 21    | 617.0  | <b>617.0</b>  | 6180    |
| A-50-rc208 | $\infty$ | 482.3  | 336    | 17    | 510.4  | <b>510.4</b>  | 6503    |

| Instance   | BKS      | RDB    | Rt (s) | Nodes | BDB    | BPB           | t (s) |
|------------|----------|--------|--------|-------|--------|---------------|-------|
| A-100-c101 | 1114.5   | 1109.1 | 23     | 3     | 1114.5 | 1114.5        | 40    |
| A-100-c102 | 1036.3   | 1033.3 | 41     | 3     | 1036.3 | 1036.3        | 77    |
| A-100-c103 | $\infty$ | 1010.0 | 104    | 1     | 1010.0 | <b>1010.0</b> | 104   |
| A-100-c104 | $\infty$ | 935.4  | 552    | 5     | 943.6  | <b>943.6</b>  | 4518  |
| A-100-c105 | 1071.6   | 1063.8 | 18     | 3     | 1071.6 | 1071.6        | 43    |
| A-100-c106 | $\infty$ | 1072.5 | 27     | 3     | 1078.9 | <b>1078.9</b> | 61    |
| A-100-c107 | 1030.6   | 1030.6 | 14     | 1     | 1030.6 | 1030.6        | 13    |
| A-100-c108 | 1029.3   | 1029.3 | 25     | 1     | 1029.3 | 1029.3        | 32    |
| A-100-c109 | $\infty$ | 977.3  | 49     | 7     | 995.1  | <b>995.1</b>  | 287   |
| A-100-c201 | $\infty$ | 675.2  | 113    | 3     | 683.6  | <b>683.6</b>  | 341   |
| A-100-c202 | $\infty$ | 672.9  | 348    | 3     | 678.5  | <b>678.5</b>  | 737   |
| A-100-c203 | $\infty$ | 663.0  | 710    | 3     | 669.1  | <b>669.1</b>  | 1383  |
| A-100-c204 | $\infty$ | 630.8  | 864    | 1     | 630.8  | $\infty$      | 6578  |
| A-100-c205 | $\infty$ | 660.8  | 125    | 5     | 674.1  | <b>674.1</b>  | 479   |
| A-100-c206 | $\infty$ | 656.6  | 171    | 3     | 664.1  | <b>664.1</b>  | 349   |
| A-100-c207 | $\infty$ | 653.1  | 255    | 3     | 663.9  | <b>663.9</b>  | 743   |
| A-100-c208 | $\infty$ | 649.8  | 488    | 3     | 660.9  | <b>660.9</b>  | 967   |
| A-100-r101 | 1840.6   | 1832.4 | 11     | 3     | 1840.6 | 1840.6        | 38    |
| A-100-r102 | 1535.4   | 1534.2 | 17     | 3     | 1535.4 | 1535.4        | 40    |
| A-100-r103 | $\infty$ | 1222.9 | 29     | 3     | 1223.7 | <b>1223.7</b> | 86    |
| A-100-r104 | $\infty$ | 1001.2 | 197    | 27    | 1009.0 | <b>1009.0</b> | 5793  |
| A-100-r105 | 1465.2   | 1459.4 | 20     | 3     | 1465.2 | 1465.2        | 72    |
| A-100-r106 | 1294.9   | 1286.5 | 41     | 27    | 1294.9 | 1294.9        | 855   |
| A-100-r107 | $\infty$ | 1097.7 | 66     | 31    | 1106.1 | <b>1106.1</b> | 3544  |
| A-100-r108 | $\infty$ | 955.2  | 241    | 421   | 968.5  | <b>968.5</b>  | 66955 |
| A-100-r109 | $\infty$ | 1225.9 | 54     | 17    | 1237.8 | <b>1237.8</b> | 1002  |
| A-100-r110 | $\infty$ | 1120.8 | 141    | 7     | 1126.8 | <b>1126.8</b> | 597   |
| A-100-r111 | $\infty$ | 1093.0 | 90     | 13    | 1100.6 | <b>1100.6</b> | 996   |
| A-100-r112 | $\infty$ | 982.9  | 400    | 11    | 987.2  | <b>987.2</b>  | 3741  |
| A-100-r201 | 1188.5   | 1184.4 | 163    | 7     | 1188.5 | 1188.5        | 694   |

| Instance    | BKS      | RDB    | Rt (s) | Nodes | BDB    | BPB           | $t$ (s) |
|-------------|----------|--------|--------|-------|--------|---------------|---------|
| A-100-r202  | $\infty$ | 1039.6 | 386    | 21    | 1044.2 | <b>1044.2</b> | 7738    |
| A-100-r203  | $\infty$ | 882.3  | 1282   | 35    | 889.9  | <b>889.9</b>  | 19393   |
| A-100-r204  | $\infty$ | 724.5  | 970    | 173   | 728.4  | <b>775.5</b>  | 108002  |
| A-100-r205  | $\infty$ | 962.3  | 435    | 33    | 973.0  | <b>973.0</b>  | 11826   |
| A-100-r206  | $\infty$ | 876.3  | 638    | 217   | 879.1  | <b>933.5</b>  | 108004  |
| A-100-r207  | $\infty$ | 793.1  | 690    | 1     | 793.1  | $\infty$      | 2640    |
| A-100-r208  | $\infty$ | 690.6  | 1041   | 1     | 690.6  | $\infty$      | 3303    |
| A-100-r209  | $\infty$ | 855.3  | 534    | 83    | 871.5  | <b>871.5</b>  | 34124   |
| A-100-r210  | $\infty$ | 896.8  | 548    | 137   | 904.5  | <b>904.5</b>  | 63478   |
| A-100-r211  | $\infty$ | 735.7  | 618    | 39    | 738.1  | $\infty$      | 26075   |
| A-100-rc101 | 1877.3   | 1847.1 | 29     | 3     | 1853.0 | <b>1853.0</b> | 83      |
| A-100-rc102 | 1598.6   | 1581.6 | 84     | 11    | 1596.0 | <b>1596.0</b> | 453     |
| A-100-rc103 | $\infty$ | 1349.4 | 142    | 11    | 1362.7 | <b>1362.7</b> | 1290    |
| A-100-rc104 | $\infty$ | 1181.8 | 262    | 9     | 1205.4 | <b>1205.4</b> | 2640    |
| A-100-rc105 | 1720.7   | 1705.8 | 63     | 3     | 1712.5 | <b>1712.5</b> | 139     |
| A-100-rc106 | $\infty$ | 1513.3 | 81     | 9     | 1518.8 | <b>1518.8</b> | 334     |
| A-100-rc107 | $\infty$ | 1310.7 | 93     | 11    | 1321.9 | <b>1321.9</b> | 712     |
| A-100-rc108 | $\infty$ | 1186.8 | 280    | 305   | 1209.5 | <b>1209.5</b> | 78481   |
| A-100-rc201 | $\infty$ | 1290.6 | 79     | 9     | 1298.7 | <b>1298.7</b> | 641     |
| A-100-rc202 | $\infty$ | 1111.7 | 205    | 9     | 1116.4 | <b>1116.4</b> | 1791    |
| A-100-rc203 | $\infty$ | 939.6  | 952    | 3     | 944.7  | <b>944.7</b>  | 1873    |
| A-100-rc204 | $\infty$ | 776.9  | 1583   | 3     | 778.7  | $\infty$      | 5049    |
| A-100-rc205 | $\infty$ | 1167.1 | 225    | 19    | 1176.4 | <b>1176.4</b> | 3132    |
| A-100-rc206 | $\infty$ | 1062.4 | 309    | 15    | 1072.7 | <b>1072.7</b> | 3349    |
| A-100-rc207 | $\infty$ | 956.6  | 798    | 95    | 970.9  | <b>970.9</b>  | 35039   |
| A-100-rc208 | $\infty$ | 766.2  | 2496   | 211   | 769.4  | <b>812.3</b>  | 108014  |

Table EC.9: Detailed results for algorithm  $\text{BCP}_{\text{all}}$  without initial upper bounds on instances of the VRPTW-S with medium shift capacities ( $\rho = 1.2$ )

| Instance  | BKS      | RDB   | Rt (s) | Nodes | BDB   | BPB          | $t$ (s) |
|-----------|----------|-------|--------|-------|-------|--------------|---------|
| B-25-c101 | 265.2    | 265.2 | 10     | 1     | 265.2 | 265.2        | 10      |
| B-25-c102 | 251.6    | 251.6 | 10     | 1     | 251.6 | 251.6        | 10      |
| B-25-c103 | 247.4    | 244.4 | 24     | 3     | 247.4 | 247.4        | 38      |
| B-25-c104 | $\infty$ | 241.9 | 56     | 1     | 241.9 | <b>241.9</b> | 56      |
| B-25-c105 | 258.8    | 258.8 | 8      | 1     | 258.8 | 258.8        | 8       |
| B-25-c106 | 265.2    | 265.2 | 12     | 1     | 265.2 | 265.2        | 12      |
| B-25-c107 | 256.6    | 256.6 | 6      | 1     | 256.6 | 256.6        | 6       |
| B-25-c108 | 256.6    | 256.6 | 26     | 3     | 256.6 | 256.6        | 43      |
| B-25-c109 | $\infty$ | 252.8 | 75     | 3     | 254.8 | <b>254.8</b> | 137     |
| B-25-c201 | 279.6    | 279.6 | 2      | 1     | 279.6 | 279.6        | 2       |
| B-25-c202 | 272.9    | 272.9 | 3      | 1     | 272.9 | 272.9        | 3       |
| B-25-c203 | 269.9    | 269.9 | 3      | 1     | 269.9 | 269.9        | 3       |
| B-25-c204 | 269.9    | 269.9 | 6      | 1     | 269.9 | 269.9        | 6       |
| B-25-c205 | 279.6    | 279.6 | 3      | 1     | 279.6 | 279.6        | 3       |
| B-25-c206 | 277.4    | 277.4 | 2      | 1     | 277.4 | 277.4        | 2       |
| B-25-c207 | 274.5    | 274.5 | 4      | 1     | 274.5 | 274.5        | 4       |
| B-25-c208 | 276.6    | 276.6 | 3      | 1     | 276.6 | 276.6        | 3       |
| B-25-r101 | 671.9    | 671.9 | 0      | 1     | 671.9 | 671.9        | 0       |
| B-25-r102 | 557.4    | 556.1 | 3      | 3     | 557.4 | 557.4        | 5       |
| B-25-r103 | 478.2    | 476.5 | 3      | 3     | 478.2 | 478.2        | 7       |
| B-25-r104 | 451.8    | 451.8 | 4      | 1     | 451.8 | 451.8        | 4       |
| B-25-r105 | 566.4    | 565.6 | 1      | 1     | 565.6 | <b>565.6</b> | 1       |
| B-25-r106 | 483.2    | 474.4 | 6      | 3     | 483.2 | 483.2        | 9       |
| B-25-r107 | 443.3    | 443.3 | 3      | 1     | 443.3 | 443.3        | 3       |
| B-25-r108 | 426.9    | 426.9 | 4      | 1     | 426.9 | 426.9        | 4       |
| B-25-r109 | 481.7    | 472.6 | 4      | 3     | 481.7 | 481.7        | 6       |
| B-25-r110 | 451.9    | 448.1 | 5      | 3     | 451.9 | 451.9        | 9       |

| Instance   | BKS      | RDB   | Rt (s) | Nodes | BDB   | BPB          | $t$ (s) |
|------------|----------|-------|--------|-------|-------|--------------|---------|
| B-25-r111  | 461.3    | 455.5 | 4      | 3     | 461.3 | 461.3        | 9       |
| B-25-r112  | 405.9    | 405.9 | 5      | 1     | 405.9 | 405.9        | 5       |
| B-25-r201  | 496.4    | 491.3 | 6      | 3     | 496.4 | 496.4        | 12      |
| B-25-r202  | 429.4    | 423.4 | 4      | 3     | 429.4 | 429.4        | 10      |
| B-25-r203  | 395.9    | 395.9 | 3      | 1     | 395.9 | 395.9        | 3       |
| B-25-r204  | 368.3    | 368.3 | 4      | 1     | 368.3 | 368.3        | 4       |
| B-25-r205  | 402.6    | 402.6 | 1      | 1     | 402.6 | 402.6        | 1       |
| B-25-r206  | 382.0    | 382.0 | 4      | 1     | 382.0 | 382.0        | 3       |
| B-25-r207  | 363.1    | 363.1 | 1      | 1     | 363.1 | 363.1        | 1       |
| B-25-r208  | 356.5    | 356.5 | 1      | 1     | 356.5 | 356.5        | 1       |
| B-25-r209  | 376.4    | 376.4 | 1      | 1     | 376.4 | 376.4        | 1       |
| B-25-r210  | 413.1    | 413.1 | 3      | 1     | 413.1 | 413.1        | 3       |
| B-25-r211  | 361.6    | 361.6 | 3      | 1     | 361.6 | 361.6        | 3       |
| B-25-rc101 | 534.9    | 534.9 | 1      | 1     | 534.9 | 534.9        | 1       |
| B-25-rc102 | 417.7    | 417.7 | 3      | 1     | 417.7 | 417.7        | 3       |
| B-25-rc103 | 398.7    | 398.7 | 6      | 1     | 398.7 | 398.7        | 6       |
| B-25-rc104 | 368.3    | 368.3 | 11     | 1     | 368.3 | 368.3        | 11      |
| B-25-rc105 | 483.7    | 479.1 | 2      | 3     | 483.7 | 483.7        | 4       |
| B-25-rc106 | 467.8    | 456.4 | 5      | 3     | 460.7 | <b>460.7</b> | 7       |
| B-25-rc107 | $\infty$ | 409.5 | 24     | 3     | 430.0 | <b>430.0</b> | 37      |
| B-25-rc108 | 369.8    | 363.4 | 27     | 1     | 363.4 | <b>363.4</b> | 27      |
| B-25-rc201 | 446.6    | 429.2 | 6      | 1     | 429.2 | <b>429.2</b> | 6       |
| B-25-rc202 | 338.0    | 338.0 | 1      | 1     | 338.0 | 338.0        | 1       |
| B-25-rc203 | 326.9    | 326.9 | 2      | 1     | 326.9 | 326.9        | 2       |
| B-25-rc204 | 299.7    | 299.7 | 2      | 1     | 299.7 | 299.7        | 2       |
| B-25-rc205 | 338.0    | 338.0 | 1      | 1     | 338.0 | 338.0        | 1       |
| B-25-rc206 | 334.4    | 334.4 | 1      | 1     | 334.4 | 334.4        | 1       |
| B-25-rc207 | 298.3    | 298.3 | 1      | 1     | 298.3 | 298.3        | 1       |
| B-25-rc208 | 294.5    | 294.5 | 3      | 1     | 294.5 | 294.5        | 3       |
| B-50-c101  | 455.1    | 431.3 | 5      | 1     | 431.3 | <b>431.3</b> | 5       |

| Instance  | BKS      | RDB    | Rt (s) | Nodes | BDB    | BPB          | $t$ (s) |
|-----------|----------|--------|--------|-------|--------|--------------|---------|
| B-50-c102 | 442.1    | 425.8  | 11     | 3     | 428.3  | <b>428.3</b> | 25      |
| B-50-c103 | 424.3    | 422.9  | 13     | 3     | 424.3  | 424.3        | 34      |
| B-50-c104 | $\infty$ | 395.0  | 260    | 9     | 409.0  | <b>409.0</b> | 3362    |
| B-50-c105 | 428.9    | 424.4  | 7      | 3     | 428.9  | 428.9        | 16      |
| B-50-c106 | 431.3    | 431.3  | 6      | 1     | 431.3  | 431.3        | 6       |
| B-50-c107 | 425.7    | 423.7  | 10     | 3     | 425.7  | 425.7        | 22      |
| B-50-c108 | 424.5    | 421.3  | 8      | 3     | 424.5  | 424.5        | 20      |
| B-50-c109 | $\infty$ | 416.7  | 25     | 3     | 421.8  | <b>421.8</b> | 49      |
| B-50-c201 | 412.3    | 412.3  | 4      | 1     | 412.3  | 412.3        | 4       |
| B-50-c202 | 407.2    | 406.7  | 59     | 3     | 407.2  | 407.2        | 95      |
| B-50-c203 | 400.0    | 396.7  | 49     | 1     | 396.7  | <b>396.7</b> | 49      |
| B-50-c204 | $\infty$ | 390.3  | 144    | 1     | 390.3  | <b>390.3</b> | 144     |
| B-50-c205 | 411.9    | 411.9  | 5      | 1     | 411.9  | 411.9        | 5       |
| B-50-c206 | 411.9    | 411.9  | 12     | 1     | 411.9  | 411.9        | 12      |
| B-50-c207 | $\infty$ | 408.3  | 72     | 3     | 411.7  | <b>411.7</b> | 131     |
| B-50-c208 | 402.6    | 402.6  | 8      | 1     | 402.6  | 402.6        | 8       |
| B-50-r101 | 1136.4   | 1131.6 | 4      | 3     | 1136.4 | 1136.4       | 5       |
| B-50-r102 | 933.7    | 930.7  | 4      | 3     | 933.7  | 933.7        | 9       |
| B-50-r103 | 792.9    | 787.0  | 10     | 3     | 792.9  | 792.9        | 24      |
| B-50-r104 | 650.0    | 642.0  | 39     | 3     | 650.0  | 650.0        | 123     |
| B-50-r105 | 982.0    | 973.2  | 4      | 3     | 979.1  | <b>979.1</b> | 10      |
| B-50-r106 | 841.0    | 836.7  | 7      | 3     | 841.0  | 841.0        | 17      |
| B-50-r107 | 741.7    | 737.0  | 16     | 3     | 741.7  | 741.7        | 38      |
| B-50-r108 | $\infty$ | 620.7  | 101    | 3     | 628.2  | <b>628.2</b> | 321     |
| B-50-r109 | 817.9    | 813.5  | 10     | 3     | 817.9  | 817.9        | 19      |
| B-50-r110 | 733.9    | 725.7  | 13     | 3     | 733.9  | 733.9        | 32      |
| B-50-r111 | 733.1    | 730.5  | 20     | 3     | 733.1  | 733.1        | 41      |
| B-50-r112 | 649.4    | 646.7  | 45     | 3     | 649.4  | 649.4        | 86      |
| B-50-r201 | 819.7    | 815.6  | 12     | 3     | 819.7  | 819.7        | 25      |
| B-50-r202 | 730.6    | 717.5  | 40     | 3     | 720.6  | <b>720.6</b> | 76      |

| Instance   | BKS      | RDB    | Rt (s) | Nodes | BDB    | BPB           | $t$ (s) |
|------------|----------|--------|--------|-------|--------|---------------|---------|
| B-50-r203  | 619.3    | 616.9  | 79     | 3     | 619.3  | 619.3         | 177     |
| B-50-r204  | $\infty$ | 520.9  | 220    | 3     | 521.1  | <b>521.1</b>  | 445     |
| B-50-r205  | 705.0    | 698.8  | 42     | 5     | 705.0  | 705.0         | 173     |
| B-50-r206  | 663.4    | 643.2  | 135    | 3     | 647.3  | <b>647.3</b>  | 337     |
| B-50-r207  | 582.7    | 582.7  | 322    | 1     | 582.7  | 582.7         | 322     |
| B-50-r208  | $\infty$ | 498.5  | 60     | 1     | 498.5  | <b>498.5</b>  | 60      |
| B-50-r209  | 611.3    | 609.0  | 55     | 3     | 611.3  | 611.3         | 126     |
| B-50-r210  | 656.6    | 653.4  | 176    | 3     | 656.6  | 656.6         | 435     |
| B-50-r211  | 536.9    | 536.9  | 139    | 1     | 536.9  | 536.9         | 139     |
| B-50-rc101 | 1098.6   | 1034.4 | 6      | 3     | 1051.1 | <b>1051.1</b> | 15      |
| B-50-rc102 | 912.1    | 909.0  | 31     | 3     | 910.0  | <b>910.0</b>  | 49      |
| B-50-rc103 | $\infty$ | 768.7  | 54     | 3     | 783.3  | <b>783.3</b>  | 96      |
| B-50-rc104 | $\infty$ | 628.0  | 124    | 3     | 631.8  | <b>631.8</b>  | 361     |
| B-50-rc105 | $\infty$ | 964.6  | 45     | 3     | 965.8  | <b>965.8</b>  | 62      |
| B-50-rc106 | $\infty$ | 866.7  | 45     | 3     | 886.7  | <b>886.7</b>  | 87      |
| B-50-rc107 | $\infty$ | 718.8  | 359    | 3     | 726.7  | <b>726.7</b>  | 824     |
| B-50-rc108 | $\infty$ | 624.5  | 170    | 11    | 700.7  | <b>700.7</b>  | 2351    |
| B-50-rc201 | 809.8    | 764.4  | 42     | 3     | 782.2  | <b>782.2</b>  | 76      |
| B-50-rc202 | 690.7    | 669.4  | 40     | 3     | 672.3  | <b>672.3</b>  | 73      |
| B-50-rc203 | $\infty$ | 610.4  | 72     | 1     | 610.4  | <b>610.4</b>  | 72      |
| B-50-rc204 | $\infty$ | 476.1  | 411    | 17    | 504.7  | <b>504.7</b>  | 5281    |
| B-50-rc205 | 680.3    | 680.3  | 15     | 1     | 680.3  | 680.3         | 15      |
| B-50-rc206 | 636.0    | 614.5  | 34     | 5     | 636.0  | 636.0         | 227     |
| B-50-rc207 | $\infty$ | 561.8  | 146    | 37    | 582.5  | <b>582.5</b>  | 5441    |
| B-50-rc208 | $\infty$ | 469.2  | 383    | 157   | 496.7  | <b>496.7</b>  | 48087   |
| B-100-c101 | 991.8    | 984.9  | 27     | 3     | 991.8  | 991.8         | 67      |
| B-100-c102 | $\infty$ | 954.2  | 42     | 3     | 955.2  | <b>955.2</b>  | 97      |
| B-100-c103 | $\infty$ | 942.9  | 149    | 9     | 949.2  | <b>949.2</b>  | 506     |
| B-100-c104 | $\infty$ | 897.1  | 359    | 5     | 904.7  | <b>904.7</b>  | 4432    |
| B-100-c105 | 964.6    | 961.4  | 21     | 3     | 964.6  | 964.6         | 44      |

| Instance   | BKS      | RDB    | Rt (s) | Nodes | BDB    | BPB           | $t$ (s) |
|------------|----------|--------|--------|-------|--------|---------------|---------|
| B-100-c106 | 972.4    | 967.1  | 36     | 3     | 972.4  | 972.4         | 70      |
| B-100-c107 | 954.6    | 949.6  | 20     | 3     | 954.6  | 954.6         | 40      |
| B-100-c108 | $\infty$ | 948.6  | 32     | 3     | 954.5  | <b>954.5</b>  | 62      |
| B-100-c109 | $\infty$ | 909.6  | 46     | 9     | 911.2  | <b>911.2</b>  | 277     |
| B-100-c201 | $\infty$ | 662.9  | 278    | 3     | 671.7  | <b>671.7</b>  | 462     |
| B-100-c202 | $\infty$ | 656.4  | 461    | 5     | 667.6  | <b>667.6</b>  | 1188    |
| B-100-c203 | $\infty$ | 645.2  | 900    | 9     | 655.6  | <b>655.6</b>  | 4088    |
| B-100-c204 | $\infty$ | 624.4  | 1573   | 1     | 624.4  | <b>681.3</b>  | 3443    |
| B-100-c205 | $\infty$ | 653.8  | 233    | 9     | 668.6  | <b>668.6</b>  | 1088    |
| B-100-c206 | $\infty$ | 643.8  | 256    | 11    | 664.1  | <b>664.1</b>  | 1339    |
| B-100-c207 | $\infty$ | 639.6  | 308    | 3     | 647.2  | <b>647.2</b>  | 616     |
| B-100-c208 | $\infty$ | 633.8  | 388    | 13    | 647.9  | <b>647.9</b>  | 2632    |
| B-100-r101 | 1721.6   | 1708.3 | 14     | 3     | 1715.7 | <b>1715.7</b> | 33      |
| B-100-r102 | 1499.5   | 1498.6 | 18     | 3     | 1499.5 | 1499.5        | 45      |
| B-100-r103 | $\infty$ | 1199.4 | 42     | 3     | 1201.5 | <b>1201.5</b> | 108     |
| B-100-r104 | 1391.3   | 978.0  | 229    | 33    | 985.8  | <b>985.8</b>  | 6548    |
| B-100-r105 | $\infty$ | 1390.2 | 22     | 3     | 1391.3 | <b>1391.3</b> | 42      |
| B-100-r106 | $\infty$ | 1260.3 | 43     | 9     | 1266.1 | <b>1266.1</b> | 415     |
| B-100-r107 | $\infty$ | 1071.5 | 96     | 11    | 1077.6 | <b>1077.6</b> | 1348    |
| B-100-r108 | $\infty$ | 931.6  | 282    | 9     | 942.0  | <b>942.0</b>  | 2686    |
| B-100-r109 | $\infty$ | 1188.0 | 64     | 37    | 1199.1 | <b>1199.1</b> | 2054    |
| B-100-r110 | $\infty$ | 1091.7 | 153    | 7     | 1095.3 | <b>1095.3</b> | 675     |
| B-100-r111 | $\infty$ | 1065.1 | 75     | 3     | 1065.5 | <b>1065.5</b> | 136     |
| B-100-r112 | $\infty$ | 964.4  | 398    | 57    | 975.7  | <b>975.7</b>  | 16094   |
| B-100-r201 | 1167.7   | 1164.2 | 98     | 5     | 1167.7 | 1167.7        | 269     |
| B-100-r202 | $\infty$ | 1031.9 | 460    | 5     | 1035.6 | <b>1035.6</b> | 2381    |
| B-100-r203 | $\infty$ | 869.5  | 632    | 63    | 879.2  | <b>879.2</b>  | 32406   |
| B-100-r204 | $\infty$ | 723.5  | 1099   | 137   | 727.4  | <b>796.8</b>  | 108022  |
| B-100-r205 | $\infty$ | 954.4  | 530    | 59    | 965.0  | <b>965.0</b>  | 21217   |
| B-100-r206 | $\infty$ | 868.3  | 655    | 265   | 874.2  | <b>892.7</b>  | 108004  |

| Instance    | BKS      | RDB    | Rt (s) | Nodes | BDB    | BPB           | $t$ (s) |
|-------------|----------|--------|--------|-------|--------|---------------|---------|
| B-100-r207  | $\infty$ | 790.7  | 1023   | 3     | 790.7  | $\infty$      | 5294    |
| B-100-r208  | $\infty$ | 689.5  | 1306   | 7     | 691.5  | $\infty$      | 8418    |
| B-100-r209  | $\infty$ | 851.2  | 718    | 183   | 853.4  | $\infty$      | 108012  |
| B-100-r210  | $\infty$ | 893.1  | 583    | 13    | 900.5  | <b>900.5</b>  | 6977    |
| B-100-r211  | $\infty$ | 735.0  | 834    | 1     | 735.0  | $\infty$      | 2701    |
| B-100-rc101 | 1759.4   | 1730.1 | 31     | 3     | 1738.2 | <b>1738.2</b> | 87      |
| B-100-rc102 | 1532.9   | 1513.5 | 112    | 5     | 1520.8 | <b>1520.8</b> | 295     |
| B-100-rc103 | $\infty$ | 1294.8 | 171    | 3     | 1302.1 | <b>1302.1</b> | 395     |
| B-100-rc104 | $\infty$ | 1143.4 | 262    | 21    | 1158.2 | <b>1158.2</b> | 3695    |
| B-100-rc105 | 1662.1   | 1614.0 | 61     | 3     | 1617.8 | <b>1617.8</b> | 131     |
| B-100-rc106 | $\infty$ | 1435.7 | 79     | 7     | 1442.9 | <b>1442.9</b> | 268     |
| B-100-rc107 | $\infty$ | 1263.7 | 97     | 9     | 1274.7 | <b>1274.7</b> | 717     |
| B-100-rc108 | $\infty$ | 1152.9 | 285    | 15    | 1166.3 | <b>1166.3</b> | 3922    |
| B-100-rc201 | 1279.8   | 1275.8 | 82     | 3     | 1279.8 | 1279.8        | 149     |
| B-100-rc202 | 1116.5   | 1101.1 | 238    | 13    | 1110.4 | <b>1110.4</b> | 1863    |
| B-100-rc203 | $\infty$ | 926.7  | 707    | 1     | 926.7  | <b>974.9</b>  | 1947    |
| B-100-rc204 | $\infty$ | 771.8  | 2407   | 3     | 773.3  | $\infty$      | 6659    |
| B-100-rc205 | $\infty$ | 1156.8 | 268    | 3     | 1157.6 | <b>1157.6</b> | 405     |
| B-100-rc206 | $\infty$ | 1050.9 | 287    | 3     | 1059.1 | <b>1059.1</b> | 590     |
| B-100-rc207 | $\infty$ | 953.4  | 700    | 59    | 968.6  | <b>968.6</b>  | 25852   |
| B-100-rc208 | $\infty$ | 763.5  | 2547   | 9     | 766.8  | $\infty$      | 13638   |

Table EC.10: Detailed results for algorithm  $\text{BCP}_{\text{all}}$  without initial upper bounds on instances of the VRPTW-S with large shift capacities ( $\rho = 1.5$ )

| Instance  | BKS   | RDB   | Rt (s) | Nodes | BDB   | BPB   | $t$ (s) |
|-----------|-------|-------|--------|-------|-------|-------|---------|
| C-25-c101 | 213.4 | 208.0 | 8      | 3     | 213.4 | 213.4 | 13      |
| C-25-c102 | 212.4 | 207.0 | 15     | 3     | 212.4 | 212.4 | 27      |

| Instance  | BKS   | RDB   | Rt (s) | Nodes | BDB   | BPB          | $t$ (s) |
|-----------|-------|-------|--------|-------|-------|--------------|---------|
| C-25-c103 | 207.5 | 206.5 | 15     | 3     | 207.5 | 207.5        | 25      |
| C-25-c104 | 204.4 | 200.9 | 11     | 3     | 204.4 | 204.4        | 24      |
| C-25-c105 | 213.4 | 206.9 | 3      | 3     | 213.4 | 213.4        | 8       |
| C-25-c106 | 213.4 | 208.0 | 11     | 3     | 213.4 | 213.4        | 17      |
| C-25-c107 | 213.4 | 206.9 | 4      | 3     | 213.4 | 213.4        | 8       |
| C-25-c108 | 213.4 | 206.9 | 4      | 3     | 213.4 | 213.4        | 8       |
| C-25-c109 | 229.5 | 206.5 | 8      | 3     | 213.4 | <b>213.4</b> | 14      |
| C-25-c201 | 252.1 | 252.1 | 5      | 1     | 252.1 | 252.1        | 5       |
| C-25-c202 | 247.1 | 247.1 | 5      | 1     | 247.1 | 247.1        | 5       |
| C-25-c203 | 244.5 | 244.5 | 6      | 1     | 244.5 | 244.5        | 6       |
| C-25-c204 | 243.0 | 243.0 | 11     | 1     | 243.0 | 243.0        | 11      |
| C-25-c205 | 251.3 | 251.3 | 5      | 1     | 251.3 | 251.3        | 5       |
| C-25-c206 | 248.7 | 248.7 | 3      | 1     | 248.7 | 248.7        | 2       |
| C-25-c207 | 245.5 | 245.5 | 7      | 1     | 245.5 | 245.5        | 7       |
| C-25-c208 | 247.2 | 247.2 | 4      | 1     | 247.2 | 247.2        | 3       |
| C-25-r101 | 617.1 | 617.1 | 0      | 1     | 617.1 | 617.1        | 0       |
| C-25-r102 | 547.1 | 547.1 | 2      | 1     | 547.1 | 547.1        | 2       |
| C-25-r103 | 454.6 | 454.6 | 1      | 1     | 454.6 | 454.6        | 1       |
| C-25-r104 | 420.8 | 418.5 | 3      | 3     | 420.8 | 420.8        | 8       |
| C-25-r105 | 551.9 | 530.7 | 1      | 1     | 530.7 | <b>530.7</b> | 1       |
| C-25-r106 | 465.4 | 465.4 | 2      | 1     | 465.4 | 465.4        | 2       |
| C-25-r107 | 425.8 | 425.8 | 1      | 1     | 425.8 | 425.8        | 0       |
| C-25-r108 | 404.3 | 404.3 | 4      | 3     | 404.3 | 404.3        | 8       |
| C-25-r109 | 447.8 | 445.7 | 2      | 3     | 447.8 | 447.8        | 5       |
| C-25-r110 | 444.1 | 444.1 | 4      | 3     | 444.1 | 444.1        | 7       |
| C-25-r111 | 428.8 | 428.8 | 1      | 1     | 428.8 | 428.8        | 1       |
| C-25-r112 | 393.0 | 393.0 | 3      | 1     | 393.0 | 393.0        | 3       |
| C-25-r201 | 467.7 | 465.7 | 4      | 3     | 467.7 | 467.7        | 9       |
| C-25-r202 | 410.5 | 410.5 | 1      | 1     | 410.5 | 410.5        | 1       |
| C-25-r203 | 391.4 | 391.4 | 2      | 1     | 391.4 | 391.4        | 2       |

| Instance   | BKS      | RDB   | Rt (s) | Nodes | BDB   | BPB          | $t$ (s) |
|------------|----------|-------|--------|-------|-------|--------------|---------|
| C-25-r204  | 366.8    | 365.6 | 28     | 3     | 366.8 | 366.8        | 59      |
| C-25-r205  | 402.6    | 400.2 | 6      | 3     | 402.6 | 402.6        | 14      |
| C-25-r206  | 375.9    | 375.9 | 3      | 1     | 375.9 | 375.9        | 3       |
| C-25-r207  | 361.6    | 361.6 | 3      | 1     | 361.6 | 361.6        | 3       |
| C-25-r208  | 340.4    | 340.4 | 1      | 1     | 340.4 | 340.4        | 1       |
| C-25-r209  | 376.4    | 375.2 | 8      | 3     | 376.4 | 376.4        | 22      |
| C-25-r210  | 404.6    | 404.6 | 1      | 1     | 404.6 | 404.6        | 1       |
| C-25-r211  | 352.0    | 352.0 | 2      | 1     | 352.0 | 352.0        | 2       |
| C-25-rc101 | 462.7    | 462.7 | 1      | 1     | 462.7 | 462.7        | 1       |
| C-25-rc102 | 400.8    | 400.8 | 6      | 1     | 400.8 | 400.8        | 6       |
| C-25-rc103 | 389.7    | 388.6 | 28     | 1     | 388.6 | <b>388.6</b> | 28      |
| C-25-rc104 | 361.0    | 361.0 | 30     | 1     | 361.0 | 361.0        | 30      |
| C-25-rc105 | 411.3    | 411.3 | 1      | 1     | 411.3 | 411.3        | 1       |
| C-25-rc106 | 396.9    | 396.9 | 2      | 1     | 396.9 | 396.9        | 2       |
| C-25-rc107 | 365.2    | 362.1 | 12     | 3     | 363.8 | <b>363.8</b> | 19      |
| C-25-rc108 | $\infty$ | 352.1 | 28     | 3     | 360.0 | <b>360.0</b> | 56      |
| C-25-rc201 | 426.0    | 397.3 | 4      | 1     | 397.3 | <b>397.3</b> | 3       |
| C-25-rc202 | 338.0    | 338.0 | 1      | 1     | 338.0 | 338.0        | 1       |
| C-25-rc203 | 326.9    | 326.9 | 1      | 1     | 326.9 | 326.9        | 1       |
| C-25-rc204 | 299.7    | 299.7 | 3      | 1     | 299.7 | 299.7        | 3       |
| C-25-rc205 | 338.0    | 338.0 | 1      | 1     | 338.0 | 338.0        | 1       |
| C-25-rc206 | 334.4    | 334.4 | 2      | 1     | 334.4 | 334.4        | 1       |
| C-25-rc207 | 298.3    | 298.3 | 2      | 1     | 298.3 | 298.3        | 2       |
| C-25-rc208 | 293.1    | 292.7 | 14     | 3     | 293.1 | 293.1        | 25      |
| C-50-c101  | 400.3    | 377.9 | 10     | 3     | 384.5 | <b>384.5</b> | 18      |
| C-50-c102  | 399.3    | 376.0 | 19     | 3     | 383.5 | <b>383.5</b> | 37      |
| C-50-c103  | 395.0    | 375.6 | 17     | 3     | 383.5 | <b>383.5</b> | 36      |
| C-50-c104  | $\infty$ | 369.5 | 27     | 3     | 378.7 | <b>378.7</b> | 70      |
| C-50-c105  | 384.5    | 376.8 | 8      | 3     | 384.5 | 384.5        | 18      |
| C-50-c106  | 384.5    | 376.8 | 9      | 3     | 384.5 | 384.5        | 18      |

| Instance  | BKS      | RDB    | Rt (s) | Nodes | BDB    | BPB          | $t$ (s) |
|-----------|----------|--------|--------|-------|--------|--------------|---------|
| C-50-c107 | 384.5    | 376.8  | 8      | 3     | 384.5  | 384.5        | 21      |
| C-50-c108 | 389.3    | 376.7  | 10     | 3     | 384.5  | <b>384.5</b> | 26      |
| C-50-c109 | 389.3    | 375.9  | 10     | 3     | 384.5  | <b>384.5</b> | 23      |
| C-50-c201 | 395.9    | 392.9  | 45     | 3     | 395.9  | 395.9        | 104     |
| C-50-c202 | 383.2    | 383.2  | 6      | 1     | 383.2  | 383.2        | 6       |
| C-50-c203 | 376.9    | 376.9  | 14     | 1     | 376.9  | 376.9        | 23      |
| C-50-c204 | 374.1    | 369.7  | 203    | 3     | 372.2  | <b>372.2</b> | 894     |
| C-50-c205 | 389.4    | 389.4  | 12     | 1     | 389.4  | 389.4        | 12      |
| C-50-c206 | 389.4    | 389.4  | 41     | 1     | 389.4  | 389.4        | 48      |
| C-50-c207 | 377.1    | 377.1  | 13     | 1     | 377.1  | 377.1        | 13      |
| C-50-c208 | 386.2    | 385.4  | 150    | 3     | 386.2  | 386.2        | 239     |
| C-50-r101 | 1049.0   | 1049.0 | 3      | 1     | 1049.0 | 1049.0       | 3       |
| C-50-r102 | 902.8    | 902.8  | 3      | 1     | 902.8  | 902.8        | 5       |
| C-50-r103 | 760.6    | 757.5  | 7      | 3     | 760.6  | 760.6        | 17      |
| C-50-r104 | 636.9    | 628.2  | 24     | 3     | 629.4  | <b>629.4</b> | 53      |
| C-50-r105 | 926.1    | 906.1  | 5      | 3     | 906.3  | <b>906.3</b> | 10      |
| C-50-r106 | 791.6    | 791.6  | 6      | 3     | 791.6  | 791.6        | 17      |
| C-50-r107 | 720.0    | 705.4  | 16     | 3     | 708.3  | <b>708.3</b> | 35      |
| C-50-r108 | $\infty$ | 608.5  | 95     | 3     | 611.1  | <b>611.1</b> | 303     |
| C-50-r109 | 791.9    | 788.3  | 6      | 3     | 791.9  | 791.9        | 14      |
| C-50-r110 | 717.3    | 705.2  | 7      | 1     | 705.2  | <b>705.2</b> | 11      |
| C-50-r111 | 714.0    | 713.8  | 15     | 3     | 714.0  | 714.0        | 27      |
| C-50-r112 | 657.2    | 634.7  | 26     | 3     | 637.1  | <b>637.1</b> | 52      |
| C-50-r201 | 803.3    | 800.2  | 9      | 3     | 800.6  | <b>800.6</b> | 21      |
| C-50-r202 | 765.4    | 708.2  | 26     | 3     | 713.8  | <b>713.8</b> | 53      |
| C-50-r203 | 617.8    | 613.8  | 67     | 3     | 615.2  | <b>615.2</b> | 114     |
| C-50-r204 | $\infty$ | 516.7  | 302    | 3     | 518.4  | <b>518.4</b> | 627     |
| C-50-r205 | 690.9    | 690.9  | 13     | 1     | 690.9  | 690.9        | 13      |
| C-50-r206 | 669.3    | 634.8  | 72     | 3     | 637.7  | <b>637.7</b> | 186     |
| C-50-r207 | $\infty$ | 580.3  | 354    | 3     | 581.5  | <b>581.5</b> | 836     |

| Instance   | BKS      | RDB   | Rt (s) | Nodes | BDB   | BPB          | $t$ (s) |
|------------|----------|-------|--------|-------|-------|--------------|---------|
| C-50-r208  | $\infty$ | 495.6 | 231    | 3     | 498.5 | <b>498.5</b> | 542     |
| C-50-r209  | 600.6    | 600.6 | 10     | 1     | 600.6 | 600.6        | 10      |
| C-50-r210  | $\infty$ | 648.2 | 118    | 3     | 651.2 | <b>651.2</b> | 227     |
| C-50-r211  | 535.5    | 535.5 | 72     | 1     | 535.5 | 535.5        | 72      |
| C-50-rc101 | 1066.7   | 945.6 | 5      | 3     | 954.9 | <b>954.9</b> | 17      |
| C-50-rc102 | 854.6    | 794.5 | 42     | 3     | 833.4 | <b>833.4</b> | 80      |
| C-50-rc103 | 716.0    | 665.4 | 32     | 3     | 714.1 | <b>714.1</b> | 77      |
| C-50-rc104 | $\infty$ | 573.7 | 326    | 3     | 599.2 | <b>599.2</b> | 3054    |
| C-50-rc105 | 913.6    | 860.2 | 16     | 3     | 894.7 | <b>894.7</b> | 43      |
| C-50-rc106 | 768.0    | 734.2 | 60     | 3     | 767.8 | <b>767.8</b> | 111     |
| C-50-rc107 | 712.8    | 662.0 | 139    | 3     | 672.4 | <b>672.4</b> | 214     |
| C-50-rc108 | $\infty$ | 580.0 | 151    | 3     | 632.6 | <b>632.6</b> | 355     |
| C-50-rc201 | 730.5    | 716.6 | 33     | 1     | 716.6 | <b>716.6</b> | 32      |
| C-50-rc202 | 636.3    | 631.7 | 267    | 3     | 636.3 | 636.3        | 443     |
| C-50-rc203 | $\infty$ | 572.4 | 722    | 7     | 579.1 | <b>579.1</b> | 2629    |
| C-50-rc204 | $\infty$ | 449.2 | 565    | 509   | 464.3 | <b>523.3</b> | 108014  |
| C-50-rc205 | 671.1    | 652.3 | 219    | 3     | 657.5 | <b>657.5</b> | 315     |
| C-50-rc206 | 610.0    | 610.0 | 14     | 1     | 610.0 | 610.0        | 14      |
| C-50-rc207 | 560.2    | 560.2 | 153    | 1     | 560.2 | 560.2        | 152     |
| C-50-rc208 | 476.7    | 459.4 | 676    | 53    | 476.7 | 476.7        | 14230   |
| C-100-c101 | 862.5    | 830.4 | 21     | 3     | 847.5 | <b>847.5</b> | 52      |
| C-100-c102 | 862.5    | 829.9 | 33     | 3     | 847.5 | <b>847.5</b> | 83      |
| C-100-c103 | $\infty$ | 828.9 | 59     | 3     | 846.3 | <b>846.3</b> | 153     |
| C-100-c104 | $\infty$ | 824.2 | 72     | 3     | 842.2 | <b>842.2</b> | 240     |
| C-100-c105 | 857.2    | 829.9 | 21     | 3     | 847.5 | <b>847.5</b> | 62      |
| C-100-c106 | 851.5    | 830.4 | 25     | 3     | 847.5 | <b>847.5</b> | 79      |
| C-100-c107 | 857.2    | 829.9 | 20     | 3     | 847.5 | <b>847.5</b> | 79      |
| C-100-c108 | $\infty$ | 829.9 | 30     | 3     | 847.5 | <b>847.5</b> | 85      |
| C-100-c109 | $\infty$ | 828.8 | 32     | 3     | 847.1 | <b>847.1</b> | 74      |
| C-100-c201 | $\infty$ | 627.0 | 181    | 1     | 627.0 | <b>627.0</b> | 181     |

| Instance   | BKS      | RDB    | Rt (s) | Nodes | BDB    | BPB           | $t$ (s) |
|------------|----------|--------|--------|-------|--------|---------------|---------|
| C-100-c202 | $\infty$ | 626.0  | 628    | 3     | 626.8  | <b>626.8</b>  | 16349   |
| C-100-c203 | $\infty$ | 617.8  | 1321   | 1     | 617.8  | <b>617.8</b>  | 1320    |
| C-100-c204 | $\infty$ | 591.1  | 1874   | 3     | 617.2  | <b>617.2</b>  | 3730    |
| C-100-c205 | $\infty$ | 623.8  | 354    | 3     | 624.1  | <b>624.1</b>  | 1272    |
| C-100-c206 | $\infty$ | 622.6  | 509    | 3     | 623.7  | <b>623.7</b>  | 3335    |
| C-100-c207 | $\infty$ | 622.1  | 678    | 3     | 622.1  | <b>623.5</b>  | 6739    |
| C-100-c208 | $\infty$ | 616.2  | 426    | 1     | 616.2  | <b>616.2</b>  | 426     |
| C-100-r101 | 1679.4   | 1632.0 | 10     | 3     | 1634.8 | <b>1634.8</b> | 27      |
| C-100-r102 | 1470.0   | 1460.4 | 14     | 1     | 1460.4 | <b>1460.4</b> | 21      |
| C-100-r103 | 1185.7   | 1184.8 | 23     | 3     | 1185.0 | <b>1185.0</b> | 50      |
| C-100-r104 | $\infty$ | 947.3  | 214    | 115   | 955.4  | <b>955.4</b>  | 8530    |
| C-100-r105 | 1361.4   | 1355.0 | 19     | 3     | 1355.3 | <b>1355.3</b> | 65      |
| C-100-r106 | 1228.0   | 1227.8 | 41     | 15    | 1228.0 | 1228.0        | 211     |
| C-100-r107 | 1047.1   | 1045.1 | 104    | 5     | 1047.1 | 1047.1        | 577     |
| C-100-r108 | $\infty$ | 911.1  | 306    | 3     | 913.6  | <b>913.6</b>  | 687     |
| C-100-r109 | 1146.9   | 1144.3 | 55     | 3     | 1146.9 | 1146.9        | 225     |
| C-100-r110 | 1068.0   | 1068.0 | 157    | 3     | 1068.0 | 1068.0        | 266     |
| C-100-r111 | $\infty$ | 1045.1 | 136    | 5     | 1048.0 | <b>1048.0</b> | 590     |
| C-100-r112 | $\infty$ | 945.1  | 446    | 7     | 948.6  | <b>948.6</b>  | 3244    |
| C-100-r201 | 1144.3   | 1143.2 | 78     | 5     | 1143.6 | <b>1143.6</b> | 313     |
| C-100-r202 | 1029.8   | 1026.1 | 323    | 9     | 1029.8 | 1029.8        | 3064    |
| C-100-r203 | $\infty$ | 868.0  | 1514   | 5     | 870.8  | <b>870.8</b>  | 4330    |
| C-100-r204 | $\infty$ | 720.2  | 1313   | 97    | 721.6  | <b>747.1</b>  | 79596   |
| C-100-r205 | $\infty$ | 944.8  | 519    | 7     | 949.8  | <b>949.8</b>  | 3305    |
| C-100-r206 | $\infty$ | 866.5  | 688    | 29    | 870.5  | <b>995.5</b>  | 34344   |
| C-100-r207 | $\infty$ | 783.0  | 853    | 85    | 787.6  | <b>827.7</b>  | 90306   |
| C-100-r208 | $\infty$ | 686.0  | 2244   | 25    | 687.5  | $\infty$      | 32906   |
| C-100-r209 | $\infty$ | 847.6  | 768    | 161   | 850.6  | <b>877.6</b>  | 75146   |
| C-100-r210 | $\infty$ | 893.2  | 1019   | 149   | 895.9  | <b>913.1</b>  | 83470   |
| C-100-r211 | $\infty$ | 736.3  | 1184   | 203   | 738.1  | <b>801.4</b>  | 108000  |

| Instance    | BKS      | RDB    | Rt (s) | Nodes | BDB    | BPB           | t (s) |
|-------------|----------|--------|--------|-------|--------|---------------|-------|
| C-100-rc101 | 1685.3   | 1619.8 | 22     | 1     | 1619.8 | <b>1619.8</b> | 28    |
| C-100-rc102 | 1471.9   | 1442.3 | 84     | 1     | 1442.3 | <b>1442.3</b> | 97    |
| C-100-rc103 | $\infty$ | 1229.2 | 114    | 7     | 1235.9 | <b>1235.9</b> | 1085  |
| C-100-rc104 | $\infty$ | 1097.6 | 252    | 3     | 1100.7 | <b>1100.7</b> | 570   |
| C-100-rc105 | 1615.5   | 1513.7 | 57     | 1     | 1513.7 | <b>1513.7</b> | 68    |
| C-100-rc106 | $\infty$ | 1366.8 | 171    | 3     | 1372.7 | <b>1372.7</b> | 312   |
| C-100-rc107 | 1207.8   | 1205.4 | 95     | 1     | 1205.4 | <b>1205.4</b> | 117   |
| C-100-rc108 | 1114.2   | 1108.5 | 242    | 3     | 1114.2 | 1114.2        | 541   |
| C-100-rc201 | 1261.8   | 1261.5 | 97     | 3     | 1261.8 | 1261.8        | 147   |
| C-100-rc202 | 1092.3   | 1092.3 | 282    | 1     | 1092.3 | 1092.3        | 314   |
| C-100-rc203 | $\infty$ | 922.7  | 904    | 11    | 925.2  | <b>1007.9</b> | 9702  |
| C-100-rc204 | $\infty$ | 770.7  | 9956   | 29    | 774.5  | <b>880.1</b>  | 68778 |
| C-100-rc205 | 1154.0   | 1152.4 | 228    | 3     | 1154.0 | 1154.0        | 419   |
| C-100-rc206 | $\infty$ | 1044.3 | 298    | 11    | 1052.2 | <b>1052.2</b> | 1955  |
| C-100-rc207 | $\infty$ | 955.2  | 1061   | 15    | 963.2  | <b>963.2</b>  | 6421  |
| C-100-rc208 | $\infty$ | 763.9  | 2848   | 77    | 767.0  | <b>800.7</b>  | 83268 |
